# Supplementary material for: Towards defining new nano-descriptors: extracting morphological features from transmission electron microscopy images
Source: Royal Society of Chemistry journal article supplement (doi:10.1039/c4ra10375k), 2014-11-05
Supplement: c4ra10375k1.pdf [file c4ra10375k1.pdf]

## Supporting Information

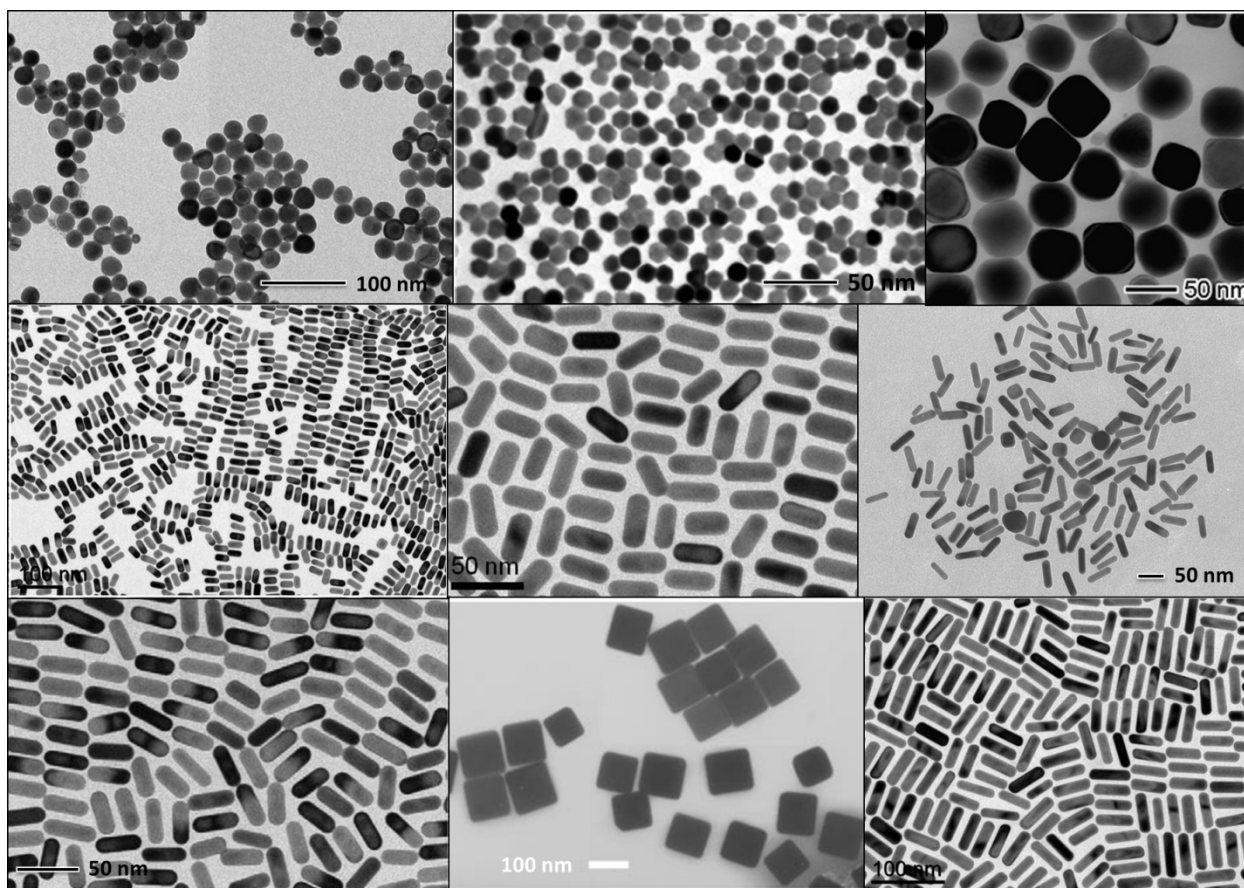

S1. Some TEM images of the whole data set [10-18]

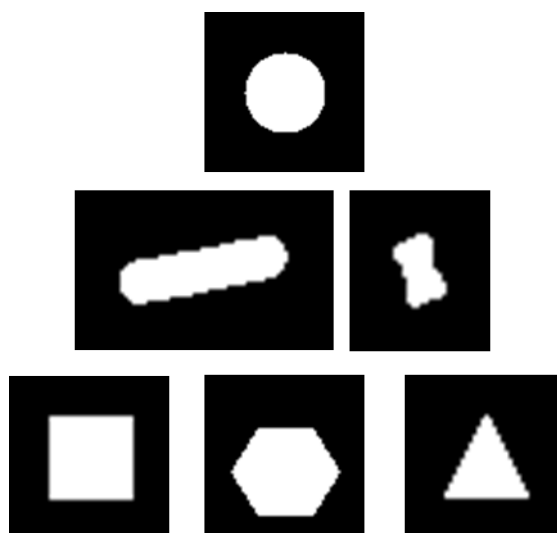

S2. Shape templates for shape match algorithm

S3\_1. Nano-descriptors calculated for TEM image in Figure 1a (Circle NPs)

| ID | Size  | SurfaceArea | Curvature | AspectRatio | CornerCount | Circle | Rod   | Dogbone | Triangle | Square | Hexagon | AgglomerationState |
|----|-------|-------------|-----------|-------------|-------------|--------|-------|---------|----------|--------|---------|--------------------|
| 1  | 11.0  | 88.0        | 0.805     | 1.100       | 7           | 0.569  | 0.201 | 0.205   | 0.864    | 0.649  | 0.840   | 0.003              |
| 2  | 12.0  | 103.0       | 0.840     | 1.133       | 8           | 0.935  | 0.249 | 0.244   | 0.773    | 0.580  | 0.796   | 0.037              |
| 3  | 12.0  | 110.5       | 0.916     | 1.063       | 8           | 0.915  | 0.115 | 0.103   | 0.736    | 0.575  | 0.813   | 0.033              |
| 4  | 12.0  | 115.0       | 0.975     | 1.000       | 7           | 0.560  | 0.000 | 0.000   | 0.866    | 0.659  | 0.830   | 0.026              |
| 5  | 14.8  | 164.0       | 1.247     | 1.105       | 8           | 0.909  | 0.190 | 0.177   | 0.744    | 0.554  | 0.785   | 0.026              |
| 6  | 12.0  | 119.5       | 1.051     | 1.000       | 8           | 0.948  | 0.000 | 0.000   | 0.794    | 0.571  | 0.797   | 0.017              |
| 7  | 13.4  | 145.0       | 1.167     | 1.000       | 8           | 0.928  | 0.000 | 0.000   | 0.759    | 0.574  | 0.801   | 0.069              |
| 8  | 11.3  | 111.0       | 0.866     | 1.000       | 8           | 0.900  | 0.000 | 0.000   | 0.735    | 0.564  | 0.799   | 0.019              |
| 9  | 12.0  | 109.5       | 0.873     | 1.091       | 8           | 0.928  | 0.165 | 0.148   | 0.788    | 0.566  | 0.798   | 0.038              |
| 10 | 12.7  | 125.5       | 1.030     | 1.059       | 8           | 0.925  | 0.108 | 0.094   | 0.800    | 0.565  | 0.790   | 0.178              |
| 11 | 12.0  | 107.5       | 0.986     | 1.091       | 7           | 0.573  | 0.183 | 0.160   | 0.878    | 0.654  | 0.823   | 0.130              |
| 12 | 14.1  | 149.5       | 1.159     | 1.053       | 8           | 0.917  | 0.099 | 0.086   | 0.732    | 0.569  | 0.811   | 0.053              |
| 13 | 13.0  | 137.5       | 1.104     | 1.000       | 8           | 0.931  | 0.000 | 0.000   | 0.778    | 0.572  | 0.808   | 0.089              |
| 14 | 12.0  | 108.5       | 0.948     | 1.091       | 8           | 0.924  | 0.165 | 0.147   | 0.782    | 0.579  | 0.804   | 0.058              |
| 15 | 11.3  | 100.5       | 0.838     | 1.067       | 8           | 0.919  | 0.121 | 0.119   | 0.772    | 0.564  | 0.808   | 0.013              |
| 16 | 13.4  | 140.5       | 1.127     | 1.056       | 7           | 0.551  | 0.109 | 0.102   | 0.886    | 0.637  | 0.814   | 0.057              |
| 17 | 12.7  | 131.0       | 1.063     | 1.000       | 8           | 0.914  | 0.000 | 0.000   | 0.741    | 0.571  | 0.775   | 0.118              |
| 18 | 12.0  | 112.5       | 0.972     | 1.063       | 8           | 0.934  | 0.120 | 0.105   | 0.747    | 0.591  | 0.810   | 0.032              |
| 19 | 11.3  | 98.5        | 0.892     | 1.067       | 7           | 0.560  | 0.139 | 0.129   | 0.859    | 0.653  | 0.833   | 0.036              |
| 20 | 14.1  | 151.5       | 0.629     | 1.053       | 7           | 0.565  | 0.100 | 0.096   | 0.840    | 0.633  | 0.840   | 0.072              |
| 21 | 14.0  | 130.5       | 1.015     | 1.273       | 7           | 0.584  | 0.545 | 0.494   | 0.905    | 0.689  | 0.863   | 0.044              |
| 22 | 13.4  | 145.0       | 1.167     | 1.000       | 8           | 0.914  | 0.000 | 0.000   | 0.759    | 0.563  | 0.802   | 0.022              |
| 23 | 215.0 | 34830.0     | 0.000     | 1.327       | 1           | 0.000  | 0.452 | 0.484   | 0.865    | 0.662  | 0.605   | 0.932              |

S3\_2. Nano-descriptors calculated for TEM image in Figure 1b (Hexagon NPs)

| ID | Size | SurfaceArea | Curvature | AspectRatio | CornerCount | Circle | Rod   | Dogbone | Triangle | Square | Hexagon | AgglomerationState |
|----|------|-------------|-----------|-------------|-------------|--------|-------|---------|----------|--------|---------|--------------------|
| 1  | 4.2  | 16.0        | 1.333     | 1.000       | 7           | 0.139  | 0.000 | 0.000   | 1.211    | 0.793  | 0.965   | 0.006              |
| 2  | 11.0 | 39.0        | 1.773     | 2.200       | 8           | 0.145  | 1.141 | 1.091   | 0.000    | 0.830  | 0.000   | 0.094              |
| 3  | 15.0 | 69.5        | 1.359     | 2.500       | 8           | 1.076  | 1.069 | 0.884   | 0.000    | 0.691  | 0.000   | 0.087              |
| 4  | 16.0 | 79.5        | 1.247     | 2.286       | 7           | 0.012  | 1.102 | 1.139   | 0.000    | 0.867  | 0.000   | 0.157              |
| 5  | 7.8  | 36.5        | 0.986     | 1.375       | 8           | 0.145  | 0.766 | 0.861   | 1.095    | 0.794  | 0.973   | 0.030              |
| 6  | 17.0 | 105.0       | 1.516     | 2.125       | 8           | 0.137  | 1.092 | 1.117   | 0.000    | 0.773  | 0.000   | 0.186              |
| 7  | 15.0 | 98.0        | 0.745     | 1.667       | 8           | 0.129  | 1.089 | 1.045   | 0.654    | 0.735  | 0.955   | 0.136              |
| 8  | 19.0 | 205.0       | 0.967     | 1.462       | 8           | 0.585  | 0.939 | 0.892   | 0.877    | 0.679  | 0.911   | 0.345              |
| 9  | 15.0 | 79.5        | 1.263     | 2.143       | 8           | 0.144  | 1.124 | 1.088   | 0.000    | 0.789  | 0.000   | 0.221              |
| 10 | 17.0 | 169.5       | 0.216     | 1.214       | 8           | 0.934  | 0.383 | 0.319   | 0.665    | 0.536  | 0.783   | 0.287              |
| 11 | 2.8  | 8.0         | 1.000     | 1.000       | 7           | 0.000  | 0.000 | 0.000   | 1.345    | 0.845  | 0.926   | 0.020              |
| 12 | 17.0 | 203.0       | 1.027     | 1.133       | 8           | 0.122  | 0.266 | 0.250   | 0.958    | 0.686  | 0.856   | 0.269              |
| 13 | 17.7 | 233.5       | 0.911     | 1.042       | 8           | 0.564  | 0.081 | 0.079   | 0.836    | 0.647  | 0.824   | 0.295              |
| 14 | 17.7 | 121.5       | 0.310     | 1.786       | 8           | 1.131  | 1.113 | 0.833   | 0.343    | 0.690  | 0.719   | 0.462              |
| 15 | 66.0 | 256.0       | 1.939     | 16.500      | 8           | 0.000  | 0.000 | 0.000   | 0.000    | 0.600  | 0.000   | 0.454              |
| 16 | 20.0 | 302.5       | 1.652     | 1.053       | 7           | 0.568  | 0.101 | 0.092   | 0.818    | 0.649  | 0.841   | 0.315              |
| 17 | 7.1  | 28.0        | 0.584     | 1.250       | 8           | 1.095  | 0.552 | 0.505   | 0.919    | 0.706  | 0.992   | 0.249              |
| 18 | 19.1 | 276.0       | 0.385     | 1.038       | 8           | 0.544  | 0.071 | 0.071   | 0.834    | 0.639  | 0.812   | 0.355              |
| 19 | 5.7  | 20.0        | 1.250     | 1.000       | 7           | 1.139  | 0.000 | 0.000   | 0.981    | 0.760  | 1.066   | 0.056              |
| 20 | 4.2  | 14.5        | 1.422     | 1.200       | 7           | 0.142  | 0.437 | 0.523   | 1.119    | 0.780  | 0.924   | 0.174              |
| 21 | 2.8  | 8.0         | 1.000     | 1.000       | 7           | 0.000  | 0.000 | 0.000   | 1.345    | 0.845  | 0.926   | 0.097              |
| 22 | 11.0 | 51.5        | 0.464     | 1.833       | 8           | 1.005  | 1.003 | 0.796   | 0.250    | 0.559  | 0.488   | 0.338              |
| 23 | 3.5  | 12.0        | 1.200     | 1.000       | 1           | 0.138  | 0.000 | 0.000   | 1.199    | 0.769  | 0.942   | 0.065              |
| 24 | 16.5 | 199.0       | 1.087     | 1.063       | 7           | 0.897  | 0.124 | 0.106   | 0.750    | 0.569  | 0.780   | 0.217              |
| 25 | 24.7 | 392.5       | 0.269     | 1.250       | 8           | 0.574  | 0.493 | 0.446   | 0.838    | 0.680  | 0.868   | 0.411              |
| 26 | 18.2 | 104.0       | 1.038     | 2.088       | 8           | 1.073  | 1.068 | 0.953   | 0.000    | 0.725  | 0.000   | 0.173              |
| 27 | 16.3 | 202.5       | 0.725     | 1.045       | 7           | 0.547  | 0.087 | 0.081   | 0.862    | 0.627  | 0.836   | 0.271              |
| 28 | 17.0 | 178.0       | 1.093     | 1.308       | 8           | 0.560  | 0.621 | 0.534   | 0.864    | 0.609  | 0.841   | 0.340              |
| 29 | 17.0 | 223.5       | 0.551     | 1.043       | 8           | 0.010  | 0.085 | 0.094   | 0.998    | 0.702  | 0.816   | 0.277              |
| 30 | 17.0 | 208.0       | 1.296     | 1.091       | 8           | 0.923  | 0.166 | 0.151   | 0.781    | 0.573  | 0.791   | 0.252              |
| 31 | 20.5 | 210.0       | 1.022     | 1.318       | 8           | 0.898  | 0.378 | 0.276   | 0.368    | 0.287  | 0.511   | 0.365              |
| 32 | 15.0 | 180.0       | 1.003     | 1.000       | 8           | 0.557  | 0.000 | 0.000   | 0.870    | 0.611  | 0.854   | 0.256              |
| 33 | 31.2 | 308.0       | 0.577     | 1.874       | 8           | 1.028  | 0.939 | 0.809   | 0.194    | 0.655  | 0.383   | 0.497              |
| 34 | 22.0 | 337.5       | 0.724     | 1.158       | 7           | 0.130  | 0.304 | 0.304   | 0.909    | 0.739  | 0.882   | 0.312              |
| 35 | 17.0 | 209.0       | 1.326     | 1.091       | 8           | 0.570  | 0.177 | 0.157   | 0.888    | 0.601  | 0.812   | 0.299              |
| 36 | 15.6 | 161.5       | 1.075     | 1.158       | 8           | 0.126  | 0.312 | 0.290   | 0.968    | 0.681  | 0.864   | 0.255              |
| 37 | 14.8 | 178.0       | 1.094     | 1.000       | 8           | 0.124  | 0.000 | 0.000   | 0.938    | 0.665  | 0.824   | 0.264              |
| 38 | 17.7 | 223.5       | 0.352     | 1.042       | 8           | 0.123  | 0.081 | 0.078   | 0.931    | 0.652  | 0.839   | 0.270              |
| 39 | 34.1 | 405.0       | 0.744     | 2.000       | 7           | 1.006  | 0.792 | 0.600   | 0.000    | 0.477  | 0.000   | 0.286              |
| 40 | 14.8 | 146.0       | 1.201     | 1.235       | 8           | 0.930  | 0.420 | 0.379   | 0.714    | 0.583  | 0.805   | 0.250              |
| 41 | 44.5 | 890.5       | 0.205     | 1.237       | 8           | 0.000  | 0.318 | 0.437   | 0.966    | 0.586  | 0.571   | 0.431              |
| 42 | 15.6 | 184.5       | 1.116     | 1.048       | 7           | 0.566  | 0.090 | 0.082   | 0.881    | 0.661  | 0.830   | 0.262              |
| 43 | 31.0 | 393.0       | 0.600     | 1.722       | 7           | 0.133  | 0.991 | 0.936   | 0.502    | 0.743  | 0.908   | 0.343              |
| 44 | 19.8 | 305.0       | 0.562     | 1.000       | 7           | 0.123  | 0.000 | 0.000   | 0.926    | 0.682  | 0.836   | 0.320              |
| 45 | 35.4 | 378.0       | 0.759     | 2.381       | 8           | 0.929  | 0.858 | 0.609   | 0.000    | 0.449  | 0.000   | 0.375              |
| 46 | 18.0 | 199.5       | 0.649     | 1.286       | 1           | 0.918  | 0.534 | 0.442   | 0.750    | 0.572  | 0.804   | 0.265              |
| 47 | 34.8 | 424.5       | 0.866     | 2.108       | 7           | 0.954  | 0.954 | 0.688   | 0.000    | 0.544  | 0.000   | 0.397              |
| 48 | 50.2 | 973.5       | 0.583     | 1.365       | 8           | 0.956  | 0.274 | 0.197   | 0.196    | 0.198  | 0.360   | 0.526              |

|     |      |        |       |       |   |       |       |       |       |       |       |       |
|-----|------|--------|-------|-------|---|-------|-------|-------|-------|-------|-------|-------|
| 49  | 15.0 | 161.0  | 0.983 | 1.154 | 8 | 0.562 | 0.300 | 0.277 | 0.837 | 0.655 | 0.848 | 0.230 |
| 50  | 14.8 | 155.5  | 0.869 | 1.167 | 7 | 0.125 | 0.334 | 0.347 | 0.933 | 0.686 | 0.836 | 0.260 |
| 51  | 16.0 | 178.5  | 0.999 | 1.143 | 8 | 0.583 | 0.287 | 0.269 | 0.863 | 0.679 | 0.863 | 0.266 |
| 52  | 17.7 | 225.0  | 0.706 | 1.087 | 8 | 0.555 | 0.166 | 0.158 | 0.851 | 0.631 | 0.827 | 0.275 |
| 53  | 17.7 | 252.5  | 0.897 | 1.042 | 8 | 0.542 | 0.079 | 0.074 | 0.850 | 0.619 | 0.821 | 0.304 |
| 54  | 52.6 | 732.0  | 0.862 | 2.449 | 8 | 0.985 | 0.632 | 0.419 | 0.000 | 0.352 | 0.000 | 0.431 |
| 55  | 14.1 | 156.5  | 0.628 | 1.053 | 8 | 0.555 | 0.100 | 0.101 | 0.857 | 0.617 | 0.822 | 0.253 |
| 56  | 15.6 | 159.5  | 0.982 | 1.158 | 8 | 0.572 | 0.314 | 0.292 | 0.871 | 0.604 | 0.832 | 0.235 |
| 57  | 35.0 | 383.0  | 0.857 | 2.059 | 7 | 0.640 | 1.046 | 0.893 | 0.000 | 0.799 | 0.000 | 0.337 |
| 58  | 19.8 | 281.5  | 0.475 | 1.037 | 8 | 0.123 | 0.073 | 0.071 | 0.943 | 0.648 | 0.838 | 0.305 |
| 59  | 19.1 | 245.5  | 0.719 | 1.227 | 8 | 0.555 | 0.423 | 0.422 | 0.829 | 0.620 | 0.824 | 0.270 |
| 60  | 14.8 | 177.0  | 1.025 | 1.000 | 8 | 0.569 | 0.000 | 0.000 | 0.850 | 0.658 | 0.860 | 0.200 |
| 61  | 17.0 | 196.0  | 0.761 | 1.200 | 8 | 0.126 | 0.400 | 0.393 | 0.920 | 0.663 | 0.837 | 0.277 |
| 62  | 16.3 | 207.5  | 0.421 | 1.045 | 7 | 0.554 | 0.084 | 0.083 | 0.881 | 0.604 | 0.817 | 0.292 |
| 63  | 16.8 | 195.0  | 0.957 | 1.128 | 8 | 0.547 | 0.243 | 0.233 | 0.835 | 0.613 | 0.851 | 0.248 |
| 64  | 16.3 | 186.0  | 1.099 | 1.095 | 8 | 0.564 | 0.181 | 0.179 | 0.837 | 0.614 | 0.855 | 0.255 |
| 65  | 15.6 | 178.0  | 1.127 | 1.100 | 7 | 0.928 | 0.186 | 0.171 | 0.757 | 0.586 | 0.792 | 0.256 |
| 66  | 16.0 | 210.5  | 1.354 | 1.000 | 7 | 0.903 | 0.000 | 0.000 | 0.697 | 0.566 | 0.788 | 0.297 |
| 67  | 16.3 | 192.0  | 0.333 | 1.095 | 7 | 0.123 | 0.184 | 0.183 | 0.904 | 0.670 | 0.847 | 0.255 |
| 68  | 13.4 | 136.5  | 1.076 | 1.056 | 8 | 0.556 | 0.106 | 0.107 | 0.863 | 0.610 | 0.826 | 0.221 |
| 69  | 18.4 | 265.0  | 0.419 | 1.000 | 1 | 0.123 | 0.000 | 0.000 | 0.883 | 0.667 | 0.845 | 0.342 |
| 70  | 14.1 | 141.0  | 1.140 | 1.111 | 7 | 0.567 | 0.222 | 0.205 | 0.892 | 0.663 | 0.854 | 0.224 |
| 71  | 17.7 | 223.5  | 1.201 | 1.136 | 8 | 0.126 | 0.259 | 0.262 | 0.931 | 0.701 | 0.840 | 0.266 |
| 72  | 16.0 | 69.0   | 1.079 | 2.667 | 8 | 0.155 | 1.128 | 1.035 | 0.000 | 0.877 | 0.000 | 0.118 |
| 73  | 14.8 | 179.0  | 1.213 | 1.000 | 7 | 0.558 | 0.000 | 0.000 | 0.859 | 0.606 | 0.826 | 0.244 |
| 74  | 29.9 | 334.0  | 0.718 | 1.849 | 8 | 0.998 | 0.703 | 0.521 | 0.134 | 0.393 | 0.347 | 0.375 |
| 75  | 19.1 | 274.5  | 0.554 | 1.038 | 8 | 0.545 | 0.075 | 0.067 | 0.836 | 0.640 | 0.820 | 0.316 |
| 76  | 17.0 | 215.0  | 1.102 | 1.063 | 8 | 0.580 | 0.125 | 0.108 | 0.810 | 0.679 | 0.852 | 0.289 |
| 77  | 15.6 | 180.5  | 1.046 | 1.048 | 8 | 0.555 | 0.095 | 0.081 | 0.864 | 0.617 | 0.829 | 0.241 |
| 78  | 14.8 | 174.5  | 0.642 | 1.050 | 8 | 0.566 | 0.101 | 0.087 | 0.838 | 0.640 | 0.853 | 0.234 |
| 79  | 12.7 | 133.0  | 0.914 | 1.000 | 8 | 0.919 | 0.000 | 0.000 | 0.754 | 0.576 | 0.784 | 0.214 |
| 80  | 18.0 | 236.0  | 1.136 | 1.059 | 7 | 0.547 | 0.111 | 0.109 | 0.790 | 0.619 | 0.825 | 0.285 |
| 81  | 17.0 | 221.5  | 1.346 | 1.043 | 8 | 0.886 | 0.082 | 0.072 | 0.735 | 0.570 | 0.785 | 0.260 |
| 82  | 15.6 | 183.0  | 0.675 | 1.000 | 8 | 0.547 | 0.000 | 0.000 | 0.877 | 0.616 | 0.838 | 0.242 |
| 83  | 18.4 | 237.5  | 0.850 | 1.130 | 8 | 0.543 | 0.245 | 0.227 | 0.798 | 0.616 | 0.847 | 0.292 |
| 84  | 18.4 | 241.5  | 0.688 | 1.130 | 8 | 0.920 | 0.240 | 0.210 | 0.716 | 0.552 | 0.777 | 0.329 |
| 85  | 16.3 | 189.0  | 1.260 | 1.095 | 7 | 0.914 | 0.178 | 0.152 | 0.713 | 0.574 | 0.816 | 0.287 |
| 86  | 15.6 | 180.5  | 1.243 | 1.048 | 8 | 0.918 | 0.089 | 0.078 | 0.765 | 0.573 | 0.785 | 0.250 |
| 87  | 15.0 | 155.5  | 0.925 | 1.154 | 8 | 0.574 | 0.306 | 0.290 | 0.864 | 0.669 | 0.866 | 0.224 |
| 88  | 16.3 | 193.5  | 1.176 | 1.045 | 7 | 0.928 | 0.088 | 0.075 | 0.730 | 0.557 | 0.790 | 0.270 |
| 89  | 16.0 | 174.5  | 0.701 | 1.143 | 7 | 0.558 | 0.263 | 0.263 | 0.845 | 0.624 | 0.843 | 0.282 |
| 90  | 17.7 | 214.5  | 1.189 | 1.136 | 7 | 0.556 | 0.254 | 0.242 | 0.809 | 0.630 | 0.850 | 0.270 |
| 91  | 17.0 | 220.0  | 0.317 | 1.000 | 8 | 0.556 | 0.000 | 0.000 | 0.832 | 0.623 | 0.812 | 0.256 |
| 92  | 17.0 | 186.0  | 0.448 | 1.214 | 1 | 0.136 | 0.433 | 0.428 | 0.930 | 0.757 | 0.915 | 0.150 |
| 93  | 14.8 | 156.0  | 1.041 | 1.105 | 7 | 0.128 | 0.211 | 0.219 | 0.937 | 0.690 | 0.858 | 0.248 |
| 94  | 18.3 | 216.0  | 0.882 | 1.206 | 8 | 0.568 | 0.405 | 0.368 | 0.816 | 0.646 | 0.849 | 0.445 |
| 95  | 17.0 | 204.0  | 0.400 | 1.091 | 8 | 0.128 | 0.183 | 0.170 | 0.958 | 0.717 | 0.890 | 0.325 |
| 96  | 17.7 | 220.5  | 1.240 | 1.136 | 7 | 0.557 | 0.267 | 0.254 | 0.832 | 0.625 | 0.821 | 0.287 |
| 97  | 14.1 | 145.5  | 0.925 | 1.176 | 8 | 0.566 | 0.330 | 0.311 | 0.904 | 0.605 | 0.824 | 0.237 |
| 98  | 16.3 | 209.0  | 1.250 | 1.000 | 8 | 0.553 | 0.000 | 0.000 | 0.888 | 0.621 | 0.813 | 0.271 |
| 99  | 34.1 | 397.5  | 0.673 | 2.024 | 8 | 0.956 | 0.860 | 0.610 | 0.000 | 0.469 | 0.000 | 0.364 |
| 100 | 16.3 | 188.5  | 1.082 | 1.150 | 8 | 0.558 | 0.292 | 0.269 | 0.805 | 0.641 | 0.833 | 0.291 |
| 101 | 31.8 | 349.0  | 0.775 | 2.018 | 8 | 1.024 | 0.835 | 0.595 | 0.000 | 0.523 | 0.000 | 0.395 |
| 102 | 16.3 | 173.0  | 1.082 | 1.211 | 8 | 0.931 | 0.388 | 0.355 | 0.735 | 0.577 | 0.827 | 0.250 |
| 103 | 18.4 | 235.0  | 0.324 | 1.083 | 7 | 0.124 | 0.162 | 0.169 | 0.927 | 0.670 | 0.839 | 0.296 |
| 104 | 14.8 | 167.0  | 1.044 | 1.105 | 8 | 0.549 | 0.207 | 0.190 | 0.848 | 0.624 | 0.816 | 0.247 |
| 105 | 17.0 | 203.0  | 0.372 | 1.091 | 8 | 0.910 | 0.164 | 0.148 | 0.764 | 0.573 | 0.803 | 0.243 |
| 106 | 14.1 | 157.0  | 0.995 | 1.000 | 8 | 0.125 | 0.000 | 0.000 | 0.943 | 0.671 | 0.868 | 0.241 |
| 107 | 15.6 | 153.0  | 0.987 | 1.222 | 8 | 0.923 | 0.438 | 0.381 | 0.743 | 0.585 | 0.825 | 0.254 |
| 108 | 15.0 | 169.0  | 1.166 | 1.071 | 7 | 0.903 | 0.128 | 0.114 | 0.725 | 0.557 | 0.801 | 0.260 |
| 109 | 85.4 | 1579.5 | 0.705 | 2.197 | 8 | 0.116 | 0.944 | 0.993 | 0.000 | 0.631 | 0.000 | 0.590 |
| 110 | 17.0 | 200.5  | 1.343 | 1.143 | 8 | 0.555 | 0.271 | 0.253 | 0.854 | 0.624 | 0.834 | 0.271 |
| 111 | 14.1 | 165.5  | 0.980 | 1.053 | 7 | 0.895 | 0.097 | 0.083 | 0.744 | 0.570 | 0.808 | 0.260 |
| 112 | 18.4 | 229.5  | 0.530 | 1.130 | 7 | 0.560 | 0.244 | 0.235 | 0.866 | 0.638 | 0.819 | 0.296 |
| 113 | 16.0 | 183.0  | 1.307 | 1.143 | 7 | 0.923 | 0.260 | 0.230 | 0.780 | 0.583 | 0.822 | 0.273 |
| 114 | 17.0 | 197.5  | 1.308 | 1.143 | 8 | 0.912 | 0.252 | 0.238 | 0.744 | 0.560 | 0.793 | 0.256 |
| 115 | 18.4 | 209.5  | 0.802 | 1.368 | 1 | 0.010 | 0.720 | 0.750 | 1.050 | 0.711 | 0.837 | 0.280 |
| 116 | 15.6 | 188.5  | 1.174 | 1.048 | 7 | 0.906 | 0.088 | 0.076 | 0.710 | 0.563 | 0.798 | 0.271 |
| 117 | 13.4 | 143.5  | 0.621 | 1.056 | 8 | 0.124 | 0.111 | 0.104 | 0.928 | 0.673 | 0.849 | 0.226 |
| 118 | 14.1 | 159.5  | 0.781 | 1.053 | 8 | 0.124 | 0.105 | 0.098 | 0.948 | 0.671 | 0.840 | 0.231 |
| 119 | 15.6 | 195.0  | 1.034 | 1.000 | 7 | 0.897 | 0.000 | 0.000 | 0.734 | 0.554 | 0.802 | 0.242 |
| 120 | 16.3 | 194.0  | 0.697 | 1.095 | 8 | 0.937 | 0.180 | 0.156 | 0.730 | 0.587 | 0.799 | 0.299 |
| 121 | 18.4 | 243.5  | 0.503 | 1.130 | 8 | 0.541 | 0.240 | 0.223 | 0.821 | 0.611 | 0.816 | 0.317 |
| 122 | 12.7 | 128.5  | 0.722 | 1.059 | 8 | 0.553 | 0.115 | 0.108 | 0.848 | 0.631 | 0.836 | 0.209 |
| 123 | 17.0 | 98.5   | 1.635 | 2.429 | 8 | 0.145 | 1.096 | 1.063 | 0.000 | 0.856 | 0.000 | 0.139 |
| 124 | 14.1 | 135.5  | 1.147 | 1.176 | 8 | 0.573 | 0.356 | 0.338 | 0.861 | 0.667 | 0.869 | 0.226 |
| 125 | 17.0 | 209.5  | 1.318 | 1.063 | 8 | 0.568 | 0.120 | 0.115 | 0.892 | 0.643 | 0.828 | 0.298 |
| 126 | 15.6 | 178.0  | 0.696 | 1.100 | 7 | 0.561 | 0.186 | 0.192 | 0.854 | 0.614 | 0.830 | 0.257 |
| 127 | 14.1 | 149.5  | 1.236 | 1.053 | 8 | 0.125 | 0.105 | 0.102 | 0.915 | 0.685 | 0.829 | 0.239 |
| 128 | 16.0 | 189.0  | 1.232 | 1.143 | 8 | 0.917 | 0.265 | 0.238 | 0.713 | 0.570 | 0.799 | 0.259 |
| 129 | 13.4 | 145.5  | 1.074 | 1.056 | 8 | 0.559 | 0.107 | 0.098 | 0.904 | 0.617 | 0.818 | 0.227 |
| 130 | 15.0 | 179.0  | 1.169 | 1.000 | 8 | 0.566 | 0.000 | 0.000 | 0.866 | 0.632 | 0.851 | 0.273 |

|     |       |         |       |       |   |       |       |       |       |       |       |       |
|-----|-------|---------|-------|-------|---|-------|-------|-------|-------|-------|-------|-------|
| 131 | 17.0  | 201.5   | 1.096 | 1.152 | 7 | 0.551 | 0.284 | 0.269 | 0.858 | 0.612 | 0.826 | 0.289 |
| 132 | 14.8  | 162.5   | 1.032 | 1.050 | 8 | 0.557 | 0.103 | 0.086 | 0.884 | 0.633 | 0.805 | 0.271 |
| 133 | 17.7  | 231.0   | 0.794 | 1.087 | 8 | 0.897 | 0.153 | 0.142 | 0.768 | 0.565 | 0.769 | 0.297 |
| 134 | 16.3  | 196.0   | 1.074 | 1.095 | 7 | 0.546 | 0.189 | 0.167 | 0.835 | 0.618 | 0.825 | 0.277 |
| 135 | 16.0  | 175.5   | 0.839 | 1.143 | 7 | 0.555 | 0.276 | 0.266 | 0.849 | 0.622 | 0.824 | 0.252 |
| 136 | 14.0  | 158.5   | 0.997 | 1.000 | 7 | 0.553 | 0.000 | 0.000 | 0.878 | 0.610 | 0.815 | 0.247 |
| 137 | 16.3  | 181.0   | 0.999 | 1.095 | 8 | 0.563 | 0.186 | 0.176 | 0.870 | 0.657 | 0.832 | 0.225 |
| 138 | 33.1  | 418.0   | 0.666 | 1.878 | 1 | 1.003 | 0.835 | 0.637 | 0.127 | 0.501 | 0.310 | 0.315 |
| 139 | 15.6  | 181.5   | 0.977 | 1.048 | 7 | 0.558 | 0.093 | 0.090 | 0.866 | 0.628 | 0.843 | 0.267 |
| 140 | 17.7  | 235.5   | 0.391 | 1.042 | 8 | 0.549 | 0.080 | 0.077 | 0.787 | 0.618 | 0.821 | 0.299 |
| 141 | 17.0  | 220.5   | 1.289 | 1.043 | 8 | 0.902 | 0.081 | 0.074 | 0.734 | 0.572 | 0.787 | 0.279 |
| 142 | 15.0  | 158.5   | 1.128 | 1.154 | 7 | 0.901 | 0.294 | 0.268 | 0.776 | 0.575 | 0.808 | 0.231 |
| 143 | 19.8  | 281.0   | 0.629 | 1.077 | 8 | 0.123 | 0.152 | 0.145 | 0.957 | 0.674 | 0.826 | 0.297 |
| 144 | 16.0  | 175.5   | 0.608 | 1.143 | 8 | 0.563 | 0.280 | 0.265 | 0.849 | 0.641 | 0.845 | 0.255 |
| 145 | 15.6  | 165.5   | 0.980 | 1.158 | 8 | 0.913 | 0.299 | 0.250 | 0.747 | 0.581 | 0.825 | 0.265 |
| 146 | 19.1  | 268.5   | 0.624 | 1.038 | 8 | 0.554 | 0.074 | 0.073 | 0.818 | 0.634 | 0.840 | 0.286 |
| 147 | 17.7  | 214.5   | 0.785 | 1.136 | 8 | 0.557 | 0.269 | 0.242 | 0.809 | 0.639 | 0.851 | 0.271 |
| 148 | 34.0  | 483.0   | 0.580 | 1.718 | 8 | 0.968 | 0.597 | 0.410 | 0.187 | 0.317 | 0.539 | 0.372 |
| 149 | 15.6  | 184.0   | 1.182 | 1.100 | 7 | 0.921 | 0.191 | 0.165 | 0.777 | 0.587 | 0.792 | 0.274 |
| 150 | 17.0  | 214.5   | 0.423 | 1.063 | 8 | 0.922 | 0.117 | 0.098 | 0.712 | 0.579 | 0.791 | 0.274 |
| 151 | 17.7  | 223.0   | 0.745 | 1.087 | 8 | 0.946 | 0.164 | 0.146 | 0.741 | 0.614 | 0.810 | 0.254 |
| 152 | 17.0  | 191.5   | 0.728 | 1.143 | 8 | 0.560 | 0.267 | 0.256 | 0.820 | 0.626 | 0.849 | 0.268 |
| 153 | 15.6  | 194.5   | 1.035 | 1.048 | 8 | 0.548 | 0.090 | 0.090 | 0.827 | 0.606 | 0.816 | 0.245 |
| 154 | 14.1  | 160.0   | 0.729 | 1.000 | 7 | 0.556 | 0.000 | 0.000 | 0.877 | 0.624 | 0.831 | 0.231 |
| 155 | 19.8  | 254.5   | 0.426 | 1.217 | 8 | 0.128 | 0.436 | 0.414 | 0.947 | 0.699 | 0.849 | 0.299 |
| 156 | 16.3  | 209.0   | 0.328 | 1.000 | 8 | 0.561 | 0.000 | 0.000 | 0.888 | 0.633 | 0.822 | 0.281 |
| 157 | 15.6  | 200.0   | 0.728 | 1.000 | 7 | 0.551 | 0.000 | 0.000 | 0.850 | 0.638 | 0.810 | 0.275 |
| 158 | 16.0  | 177.5   | 1.400 | 1.143 | 7 | 0.566 | 0.280 | 0.268 | 0.858 | 0.649 | 0.846 | 0.216 |
| 159 | 34.6  | 626.0   | 0.642 | 1.140 | 7 | 0.885 | 0.112 | 0.071 | 0.195 | 0.173 | 0.336 | 0.429 |
| 160 | 16.3  | 198.5   | 0.787 | 1.045 | 8 | 0.901 | 0.086 | 0.076 | 0.747 | 0.568 | 0.794 | 0.270 |
| 161 | 18.4  | 244.0   | 0.888 | 1.083 | 1 | 0.544 | 0.156 | 0.150 | 0.820 | 0.622 | 0.795 | 0.355 |
| 162 | 32.2  | 452.0   | 0.114 | 1.565 | 7 | 1.001 | 0.892 | 0.717 | 0.535 | 0.554 | 0.832 | 0.407 |
| 163 | 4.2   | 14.5    | 1.422 | 1.200 | 8 | 0.142 | 0.431 | 0.518 | 1.117 | 0.780 | 0.924 | 0.002 |
| 164 | 17.0  | 197.5   | 1.056 | 1.143 | 8 | 0.564 | 0.291 | 0.269 | 0.843 | 0.606 | 0.820 | 0.247 |
| 165 | 17.0  | 198.5   | 0.904 | 1.143 | 7 | 0.923 | 0.256 | 0.239 | 0.747 | 0.558 | 0.800 | 0.272 |
| 166 | 53.0  | 1081.0  | 0.504 | 1.514 | 8 | 0.860 | 0.063 | 0.030 | 0.018 | 0.020 | 0.054 | 0.464 |
| 167 | 18.0  | 235.0   | 1.010 | 1.059 | 8 | 0.554 | 0.108 | 0.109 | 0.837 | 0.630 | 0.835 | 0.296 |
| 168 | 18.4  | 237.5   | 1.068 | 1.130 | 8 | 0.916 | 0.231 | 0.208 | 0.704 | 0.551 | 0.807 | 0.309 |
| 169 | 17.7  | 236.5   | 0.343 | 1.042 | 8 | 0.123 | 0.079 | 0.081 | 0.881 | 0.668 | 0.841 | 0.275 |
| 170 | 16.3  | 202.0   | 0.871 | 1.095 | 8 | 0.550 | 0.180 | 0.169 | 0.858 | 0.612 | 0.824 | 0.272 |
| 171 | 2.8   | 8.0     | 1.000 | 1.000 | 8 | 0.000 | 0.000 | 0.000 | 1.345 | 0.845 | 0.926 | 0.006 |
| 172 | 15.0  | 157.5   | 1.128 | 1.154 | 7 | 0.559 | 0.297 | 0.293 | 0.874 | 0.636 | 0.831 | 0.193 |
| 173 | 16.3  | 183.5   | 0.870 | 1.150 | 8 | 0.567 | 0.286 | 0.281 | 0.877 | 0.636 | 0.847 | 0.245 |
| 174 | 15.6  | 192.5   | 1.077 | 1.048 | 8 | 0.902 | 0.088 | 0.079 | 0.723 | 0.565 | 0.793 | 0.268 |
| 175 | 16.3  | 205.0   | 0.720 | 1.000 | 8 | 0.561 | 0.000 | 0.000 | 0.873 | 0.629 | 0.858 | 0.283 |
| 176 | 15.6  | 180.5   | 0.258 | 1.048 | 8 | 0.124 | 0.096 | 0.086 | 0.952 | 0.692 | 0.842 | 0.359 |
| 177 | 15.6  | 186.5   | 1.230 | 1.048 | 7 | 0.903 | 0.088 | 0.080 | 0.744 | 0.555 | 0.787 | 0.306 |
| 178 | 15.6  | 195.0   | 0.760 | 1.000 | 8 | 0.915 | 0.000 | 0.000 | 0.734 | 0.558 | 0.780 | 0.363 |
| 179 | 16.3  | 196.5   | 1.244 | 1.045 | 8 | 0.894 | 0.087 | 0.076 | 0.740 | 0.565 | 0.791 | 0.369 |
| 180 | 17.0  | 218.0   | 0.836 | 1.091 | 7 | 0.541 | 0.167 | 0.163 | 0.819 | 0.626 | 0.800 | 0.349 |
| 181 | 14.8  | 142.5   | 0.387 | 1.167 | 7 | 0.138 | 0.349 | 0.339 | 0.927 | 0.782 | 0.949 | 0.107 |
| 182 | 19.0  | 255.5   | 0.602 | 1.118 | 7 | 0.897 | 0.216 | 0.185 | 0.756 | 0.575 | 0.770 | 0.362 |
| 183 | 3.5   | 12.0    | 1.455 | 1.000 | 8 | 0.138 | 0.000 | 0.000 | 1.181 | 0.769 | 0.948 | 0.015 |
| 184 | 18.0  | 117.5   | 0.821 | 2.250 | 1 | 0.139 | 1.132 | 0.982 | 0.000 | 0.815 | 0.000 | 0.220 |
| 185 | 15.6  | 194.5   | 1.049 | 1.048 | 7 | 0.570 | 0.094 | 0.088 | 0.827 | 0.657 | 0.822 | 0.312 |
| 186 | 3.5   | 12.0    | 1.455 | 1.000 | 8 | 0.138 | 0.000 | 0.000 | 1.181 | 0.769 | 0.948 | 0.015 |
| 187 | 32.5  | 392.0   | 0.690 | 1.878 | 8 | 0.992 | 0.876 | 0.713 | 0.153 | 0.594 | 0.347 | 0.408 |
| 188 | 12.0  | 40.0    | 1.667 | 3.000 | 7 | 0.162 | 1.234 | 1.233 | 0.000 | 0.930 | 0.000 | 0.098 |
| 189 | 21.0  | 226.5   | 0.992 | 1.500 | 8 | 0.130 | 1.028 | 0.963 | 0.944 | 0.734 | 0.919 | 0.280 |
| 190 | 35.1  | 391.0   | 0.640 | 2.083 | 8 | 1.014 | 0.883 | 0.709 | 0.000 | 0.565 | 0.000 | 0.362 |
| 191 | 22.0  | 296.5   | 0.726 | 1.158 | 8 | 0.127 | 0.309 | 0.294 | 0.911 | 0.684 | 0.857 | 0.316 |
| 192 | 19.0  | 227.5   | 1.244 | 1.267 | 8 | 0.567 | 0.528 | 0.459 | 0.856 | 0.667 | 0.861 | 0.281 |
| 193 | 26.1  | 346.5   | 0.544 | 1.398 | 8 | 0.921 | 0.592 | 0.502 | 0.512 | 0.461 | 0.727 | 0.319 |
| 194 | 16.0  | 145.5   | 1.178 | 1.455 | 8 | 0.597 | 0.942 | 0.870 | 0.871 | 0.706 | 0.913 | 0.221 |
| 195 | 309.0 | 77217.0 | 0.144 | 1.212 | 7 | 0.000 | 0.283 | 3.766 | 0.914 | 0.654 | 0.592 | 0.964 |

S3\_3. Nano-descriptors calculated for TEM image in Figure 1c (Triangle NPs)

| ID | Size | SurfaceArea | Curvature | AspectRatio | CornerCount | Circle | Rod   | Dogbone | Triangle | Square | Hexagon | AgglomerationState |
|----|------|-------------|-----------|-------------|-------------|--------|-------|---------|----------|--------|---------|--------------------|
| 1  | 23.2 | 150.0       | 0.224     | 2.350       | 10          | 1.049  | 0.907 | 0.698   | 0.000    | 0.535  | 0.000   | 0.072              |
| 2  | 40.1 | 986.5       | 0.171     | 1.026       | 6           | 0.124  | 0.052 | 0.051   | 0.849    | 0.676  | 0.839   | 0.092              |
| 3  | 20.0 | 114.0       | 0.990     | 2.222       | 8           | 1.019  | 1.017 | 0.884   | 0.000    | 0.684  | 0.000   | 0.064              |
| 4  | 51.4 | 1355.0      | 0.036     | 1.139       | 4           | 0.000  | 0.252 | 0.291   | 0.996    | 0.750  | 0.805   | 0.456              |
| 5  | 44.9 | 1170.0      | 0.848     | 1.076       | 5           | 0.010  | 0.143 | 0.148   | 0.948    | 0.660  | 0.816   | 0.307              |
| 6  | 18.4 | 157.5       | 0.379     | 1.305       | 15          | 1.010  | 0.205 | 0.124   | 0.153    | 0.156  | 0.325   | 0.071              |
| 7  | 2.8  | 8.0         | 1.000     | 1.000       | 4           | 0.000  | 0.000 | 0.000   | 1.345    | 0.845  | 0.926   | 0.000              |
| 8  | 36.0 | 560.5       | 0.675     | 1.565       | 5           | 0.011  | 0.973 | 1.017   | 0.822    | 0.773  | 0.892   | 0.215              |
| 9  | 1.4  | 2.0         | inf       | 1.000       | 4           | 0.001  | 0.000 | 0.000   | 1.788    | 1.364  | 1.268   | 0.000              |



|    |       |         |       |       |    |       |       |       |       |       |       |       |
|----|-------|---------|-------|-------|----|-------|-------|-------|-------|-------|-------|-------|
| 10 | 28.7  | 282.0   | 0.278 | 1.373 | 15 | 0.998 | 0.239 | 0.149 | 0.152 | 0.149 | 0.294 | 0.127 |
| 11 | 36.1  | 747.5   | 0.952 | 1.133 | 5  | 0.010 | 0.260 | 0.270 | 0.972 | 0.684 | 0.821 | 0.250 |
| 12 | 62.9  | 1925.0  | 1.009 | 1.369 | 10 | 0.886 | 0.560 | 0.462 | 0.507 | 0.438 | 0.664 | 0.630 |
| 13 | 46.9  | 1163.0  | 0.275 | 1.104 | 4  | 0.000 | 0.184 | 0.209 | 0.948 | 0.713 | 0.764 | 0.334 |
| 14 | 32.1  | 499.5   | 0.247 | 1.091 | 16 | 0.966 | 0.045 | 0.026 | 0.102 | 0.099 | 0.210 | 0.203 |
| 15 | 59.4  | 1380.0  | 0.501 | 1.523 | 6  | 0.121 | 0.881 | 0.912 | 0.864 | 0.683 | 0.850 | 0.220 |
| 16 | 2.1   | 4.0     | inf   | 1.000 | 4  | 0.000 | 0.000 | 0.000 | 1.594 | 1.039 | 1.096 | 0.000 |
| 17 | 58.1  | 1909.5  | 0.669 | 1.074 | 12 | 0.875 | 0.083 | 0.061 | 0.315 | 0.280 | 0.489 | 0.358 |
| 18 | 4.9   | 19.5    | 1.811 | 1.167 | 7  | 0.628 | 0.356 | 0.376 | 0.997 | 0.701 | 0.924 | 0.000 |
| 19 | 38.5  | 772.0   | 0.527 | 1.159 | 5  | 0.011 | 0.299 | 0.320 | 0.950 | 0.755 | 0.863 | 0.301 |
| 20 | 5.7   | 25.0    | 1.563 | 1.000 | 7  | 0.647 | 0.000 | 0.000 | 1.056 | 0.745 | 0.983 | 0.000 |
| 21 | 24.9  | 405.5   | 0.531 | 1.136 | 12 | 0.887 | 0.155 | 0.112 | 0.327 | 0.281 | 0.519 | 0.175 |
| 22 | 23.3  | 398.0   | 0.141 | 1.000 | 11 | 0.913 | 0.000 | 0.000 | 0.423 | 0.370 | 0.596 | 0.247 |
| 23 | 86.6  | 2091.0  | 0.620 | 1.933 | 1  | 0.000 | 0.647 | 0.894 | 0.129 | 0.668 | 0.135 | 0.649 |
| 24 | 46.0  | 1251.0  | 0.312 | 1.150 | 6  | 0.130 | 0.274 | 0.266 | 0.874 | 0.726 | 0.909 | 0.299 |
| 25 | 2.8   | 8.0     | 1.000 | 1.000 | 4  | 0.000 | 0.000 | 0.000 | 1.345 | 0.845 | 0.926 | 0.015 |
| 26 | 26.9  | 515.5   | 0.347 | 1.118 | 7  | 0.542 | 0.214 | 0.201 | 0.823 | 0.606 | 0.818 | 0.162 |
| 27 | 2.8   | 8.0     | 1.000 | 1.000 | 4  | 0.000 | 0.000 | 0.000 | 1.345 | 0.845 | 0.926 | 0.110 |
| 28 | 2.8   | 8.0     | 1.000 | 1.000 | 4  | 0.000 | 0.000 | 0.000 | 1.345 | 0.845 | 0.926 | 0.000 |
| 29 | 9.2   | 55.0    | 0.188 | 1.083 | 8  | 0.974 | 0.167 | 0.156 | 0.843 | 0.639 | 0.858 | 0.419 |
| 30 | 7.1   | 28.0    | 0.194 | 1.250 | 8  | 1.088 | 0.568 | 0.510 | 0.913 | 0.724 | 0.982 | 0.265 |
| 31 | 2.8   | 8.0     | 1.000 | 1.000 | 4  | 0.000 | 0.000 | 0.000 | 1.345 | 0.845 | 0.926 | 0.057 |
| 32 | 86.9  | 4343.0  | 0.159 | 1.052 | 5  | 0.010 | 0.093 | 0.095 | 0.957 | 0.695 | 0.814 | 0.351 |
| 33 | 34.0  | 176.0   | 1.473 | 4.857 | 5  | 0.012 | 0.000 | 0.000 | 0.000 | 0.893 | 0.000 | 0.016 |
| 34 | 23.3  | 278.0   | 0.156 | 1.269 | 7  | 0.557 | 0.493 | 0.496 | 0.838 | 0.624 | 0.851 | 0.055 |
| 35 | 310.0 | 76364.5 | 0.130 | 1.235 | 2  | 0.000 | 0.347 | 4.481 | 0.963 | 0.700 | 0.672 | 0.914 |

S3\_4. Nano-descriptors calculated for TEM image in Figure 1d (Square NPs)

| ID | Size | SurfaceArea | Curvature | AspectRatio | CornerCount | Circle | Rod   | Dogbone | Triangle | Square | Hexagon | AgglomerationState |
|----|------|-------------|-----------|-------------|-------------|--------|-------|---------|----------|--------|---------|--------------------|
| 1  | 15.0 | 108.0       | 0.742     | 1.500       | 6           | 0.139  | 1.038 | 0.969   | 1.001    | 0.745  | 0.944   | 0.108              |
| 2  | 14.0 | 113.0       | 0.695     | 1.273       | 6           | 0.127  | 0.561 | 0.551   | 0.983    | 0.684  | 0.873   | 0.087              |
| 3  | 2.8  | 8.0         | 1.000     | 1.000       | 4           | 0.000  | 0.000 | 0.000   | 1.345    | 0.845  | 0.926   | 0.000              |
| 4  | 16.6 | 118.5       | 0.683     | 1.802       | 9           | 1.022  | 0.882 | 0.754   | 0.254    | 0.593  | 0.577   | 0.286              |
| 5  | 14.1 | 142.0       | 0.863     | 1.111       | 7           | 0.566  | 0.223 | 0.212   | 0.880    | 0.663  | 0.871   | 0.304              |
| 6  | 10.6 | 83.5        | 0.532     | 1.250       | 7           | 0.576  | 0.482 | 0.477   | 0.912    | 0.658  | 0.845   | 0.200              |
| 7  | 14.3 | 156.0       | 0.569     | 1.103       | 6           | 0.124  | 0.213 | 0.204   | 0.931    | 0.681  | 0.837   | 0.180              |
| 8  | 7.8  | 47.5        | 0.523     | 1.100       | 7           | 0.610  | 0.207 | 0.207   | 0.900    | 0.690  | 0.892   | 0.048              |
| 9  | 9.2  | 59.0        | 0.652     | 1.182       | 8           | 0.964  | 0.354 | 0.346   | 0.777    | 0.602  | 0.852   | 0.092              |
| 10 | 14.0 | 124.0       | 0.800     | 1.400       | 7           | 0.574  | 0.796 | 0.758   | 0.884    | 0.655  | 0.879   | 0.159              |
| 11 | 14.0 | 166.0       | 0.939     | 1.077       | 4           | 0.000  | 0.146 | 0.159   | 1.012    | 0.746  | 0.819   | 0.258              |
| 12 | 29.3 | 265.5       | 0.369     | 2.157       | 8           | 0.988  | 1.023 | 0.833   | 0.000    | 0.644  | 0.000   | 0.365              |
| 13 | 15.5 | 157.5       | 0.782     | 1.225       | 7           | 0.562  | 0.424 | 0.410   | 0.859    | 0.640  | 0.874   | 0.279              |
| 14 | 15.4 | 137.5       | 0.600     | 1.346       | 7           | 0.575  | 0.676 | 0.624   | 0.877    | 0.663  | 0.880   | 0.221              |
| 15 | 12.6 | 124.0       | 0.685     | 1.053       | 7           | 0.563  | 0.106 | 0.092   | 0.899    | 0.654  | 0.842   | 0.237              |
| 16 | 13.0 | 149.5       | 0.871     | 1.000       | 7           | 0.573  | 0.000 | 0.000   | 0.848    | 0.658  | 0.846   | 0.297              |
| 17 | 14.1 | 153.0       | 0.594     | 1.250       | 5           | 0.010  | 0.466 | 0.545   | 0.967    | 0.703  | 0.809   | 0.165              |
| 18 | 14.1 | 163.0       | 0.722     | 1.041       | 6           | 0.125  | 0.082 | 0.077   | 0.969    | 0.681  | 0.827   | 0.192              |
| 19 | 13.2 | 122.0       | 0.487     | 1.044       | 6           | 0.127  | 0.089 | 0.086   | 0.974    | 0.731  | 0.891   | 0.192              |
| 20 | 10.6 | 73.5        | 0.668     | 1.250       | 7           | 0.595  | 0.535 | 0.507   | 0.918    | 0.649  | 0.870   | 0.160              |
| 21 | 12.6 | 94.0        | 0.417     | 1.250       | 8           | 0.949  | 0.493 | 0.423   | 0.755    | 0.605  | 0.860   | 0.178              |
| 22 | 4.2  | 17.0        | 1.417     | 1.000       | 5           | 0.011  | 0.000 | 0.000   | 1.212    | 0.775  | 0.911   | 0.019              |
| 23 | 15.8 | 171.5       | 0.723     | 1.190       | 6           | 0.124  | 0.383 | 0.380   | 0.913    | 0.684  | 0.866   | 0.274              |
| 24 | 14.0 | 157.0       | 1.048     | 1.077       | 7           | 0.565  | 0.147 | 0.145   | 0.880    | 0.656  | 0.837   | 0.252              |
| 25 | 17.7 | 138.0       | 0.762     | 1.820       | 6           | 0.137  | 0.981 | 1.018   | 0.360    | 0.783  | 0.600   | 0.265              |
| 26 | 9.9  | 63.5        | 0.657     | 1.273       | 8           | 0.987  | 0.527 | 0.459   | 0.842    | 0.618  | 0.823   | 0.131              |
| 27 | 29.3 | 355.5       | 0.811     | 1.947       | 10          | 1.004  | 0.845 | 0.640   | 0.059    | 0.483  | 0.138   | 0.358              |
| 28 | 11.3 | 51.0        | 0.873     | 2.000       | 7           | 0.634  | 1.152 | 1.051   | 0.000    | 0.696  | 0.000   | 0.192              |
| 29 | 12.0 | 117.5       | 0.265     | 1.063       | 4           | 0.000  | 0.121 | 0.139   | 1.108    | 0.741  | 0.785   | 0.212              |
| 30 | 13.7 | 137.0       | 0.653     | 1.088       | 6           | 0.123  | 0.175 | 0.186   | 0.949    | 0.665  | 0.847   | 0.253              |
| 31 | 3.5  | 12.0        | 1.455     | 1.000       | 6           | 0.138  | 0.000 | 0.000   | 1.181    | 0.769  | 0.948   | 0.022              |
| 32 | 13.4 | 136.0       | 0.644     | 1.118       | 6           | 0.125  | 0.237 | 0.248   | 0.926    | 0.678  | 0.832   | 0.275              |
| 33 | 16.6 | 185.0       | 0.709     | 1.247       | 5           | 0.010  | 0.471 | 0.523   | 1.051    | 0.722  | 0.878   | 0.313              |
| 34 | 14.5 | 151.5       | 0.778     | 1.138       | 6           | 0.125  | 0.276 | 0.273   | 0.929    | 0.669  | 0.862   | 0.253              |
| 35 | 14.0 | 123.0       | 0.698     | 1.273       | 6           | 0.125  | 0.538 | 0.550   | 0.943    | 0.687  | 0.862   | 0.275              |
| 36 | 13.3 | 144.5       | 0.596     | 1.043       | 5           | 0.010  | 0.085 | 0.088   | 1.040    | 0.699  | 0.815   | 0.302              |
| 37 | 16.5 | 195.0       | 0.686     | 1.194       | 5           | 0.010  | 0.373 | 0.384   | 0.987    | 0.717  | 0.841   | 0.303              |
| 38 | 14.3 | 157.0       | 0.839     | 1.103       | 6           | 0.123  | 0.207 | 0.218   | 0.943    | 0.671  | 0.827   | 0.255              |
| 39 | 12.0 | 59.0        | 0.501     | 1.714       | 6           | 0.140  | 1.111 | 1.071   | 0.609    | 0.743  | 0.943   | 0.161              |
| 40 | 12.0 | 101.0       | 0.830     | 1.133       | 8           | 0.980  | 0.253 | 0.240   | 0.778    | 0.619  | 0.860   | 0.216              |
| 41 | 12.0 | 94.0        | 0.729     | 1.308       | 7           | 0.592  | 0.638 | 0.569   | 0.849    | 0.671  | 0.893   | 0.221              |
| 42 | 16.0 | 185.5       | 0.828     | 1.143       | 8           | 0.942  | 0.261 | 0.235   | 0.747    | 0.587  | 0.803   | 0.163              |
| 43 | 14.0 | 146.0       | 0.910     | 1.167       | 8           | 0.925  | 0.320 | 0.285   | 0.732    | 0.588  | 0.819   | 0.120              |
| 44 | 16.2 | 111.5       | 0.842     | 1.771       | 10          | 1.051  | 0.855 | 0.646   | 0.269    | 0.496  | 0.624   | 0.260              |
| 45 | 15.2 | 142.5       | 0.700     | 1.259       | 6           | 0.130  | 0.532 | 0.534   | 0.918    | 0.734  | 0.916   | 0.238              |
| 46 | 13.4 | 145.0       | 0.805     | 1.118       | 8           | 0.921  | 0.220 | 0.191   | 0.785    | 0.567  | 0.785   | 0.282              |
| 47 | 15.6 | 152.0       | 0.857     | 1.467       | 7           | 0.566  | 0.834 | 0.900   | 0.822    | 0.645  | 0.835   | 0.140              |
| 48 | 12.7 | 142.5       | 0.626     | 1.059       | 5           | 0.010  | 0.114 | 0.117   | 1.020    | 0.692  | 0.803   | 0.123              |
| 49 | 15.2 | 168.0       | 0.897     | 1.172       | 5           | 0.010  | 0.338 | 0.351   | 1.012    | 0.707  | 0.828   | 0.171              |
| 50 | 15.4 | 142.5       | 0.956     | 1.360       | 5           | 0.011  | 0.685 | 0.774   | 0.984    | 0.737  | 0.876   | 0.198              |
| 51 | 18.4 | 232.5       | 0.903     | 1.368       | 7           | 0.565  | 0.741 | 0.687   | 0.836    | 0.659  | 0.815   | 0.223              |

|     |      |       |       |       |    |       |       |       |       |       |       |       |
|-----|------|-------|-------|-------|----|-------|-------|-------|-------|-------|-------|-------|
| 52  | 18.0 | 145.5 | 0.805 | 1.676 | 7  | 0.598 | 0.999 | 0.919 | 0.542 | 0.705 | 0.928 | 0.106 |
| 53  | 16.0 | 149.0 | 0.844 | 1.455 | 7  | 0.611 | 0.946 | 0.888 | 0.891 | 0.704 | 0.938 | 0.159 |
| 54  | 17.1 | 224.0 | 0.902 | 1.080 | 6  | 0.122 | 0.152 | 0.164 | 0.936 | 0.663 | 0.833 | 0.213 |
| 55  | 13.4 | 164.0 | 0.961 | 1.000 | 6  | 0.122 | 0.000 | 0.000 | 0.970 | 0.654 | 0.824 | 0.117 |
| 56  | 13.3 | 132.5 | 0.724 | 1.078 | 8  | 0.931 | 0.154 | 0.133 | 0.742 | 0.582 | 0.802 | 0.241 |
| 57  | 15.2 | 139.0 | 0.796 | 1.360 | 7  | 0.585 | 0.732 | 0.665 | 0.871 | 0.685 | 0.882 | 0.208 |
| 58  | 9.9  | 68.0  | 0.660 | 1.167 | 7  | 0.616 | 0.331 | 0.324 | 0.919 | 0.691 | 0.906 | 0.028 |
| 59  | 23.3 | 261.5 | 0.714 | 1.424 | 10 | 0.944 | 0.636 | 0.520 | 0.527 | 0.455 | 0.728 | 0.285 |
| 60  | 12.7 | 137.5 | 0.680 | 1.059 | 5  | 0.010 | 0.114 | 0.121 | 0.999 | 0.688 | 0.803 | 0.179 |
| 61  | 14.1 | 138.5 | 0.757 | 1.176 | 7  | 0.573 | 0.336 | 0.350 | 0.865 | 0.634 | 0.835 | 0.224 |
| 62  | 15.0 | 152.0 | 0.801 | 1.250 | 6  | 0.124 | 0.481 | 0.485 | 0.944 | 0.691 | 0.868 | 0.259 |
| 63  | 12.7 | 141.0 | 0.554 | 1.000 | 6  | 0.123 | 0.000 | 0.000 | 0.946 | 0.670 | 0.835 | 0.227 |
| 64  | 12.7 | 139.0 | 0.975 | 1.000 | 8  | 0.916 | 0.000 | 0.000 | 0.764 | 0.559 | 0.775 | 0.165 |
| 65  | 16.5 | 199.0 | 0.857 | 1.115 | 6  | 0.123 | 0.233 | 0.234 | 0.937 | 0.676 | 0.843 | 0.254 |
| 66  | 17.4 | 225.0 | 0.817 | 1.122 | 6  | 0.124 | 0.240 | 0.234 | 0.940 | 0.696 | 0.855 | 0.291 |
| 67  | 2.8  | 8.0   | 1.000 | 1.000 | 4  | 0.000 | 0.000 | 0.000 | 1.345 | 0.845 | 0.926 | 0.001 |
| 68  | 13.0 | 118.0 | 1.012 | 1.182 | 8  | 0.929 | 0.333 | 0.321 | 0.789 | 0.587 | 0.842 | 0.214 |
| 69  | 12.0 | 101.0 | 0.171 | 1.063 | 8  | 0.974 | 0.117 | 0.118 | 0.845 | 0.594 | 0.834 | 0.155 |
| 70  | 13.0 | 141.0 | 0.848 | 1.000 | 7  | 0.558 | 0.000 | 0.000 | 0.908 | 0.619 | 0.833 | 0.135 |
| 71  | 10.6 | 72.5  | 0.782 | 1.250 | 8  | 0.967 | 0.462 | 0.469 | 0.815 | 0.607 | 0.850 | 0.143 |
| 72  | 14.1 | 136.0 | 1.112 | 1.250 | 7  | 0.567 | 0.500 | 0.457 | 0.885 | 0.666 | 0.863 | 0.199 |
| 73  | 16.3 | 232.5 | 0.842 | 1.045 | 6  | 0.122 | 0.090 | 0.088 | 0.967 | 0.682 | 0.805 | 0.313 |
| 74  | 15.8 | 173.0 | 0.821 | 1.190 | 5  | 0.010 | 0.357 | 0.390 | 0.993 | 0.697 | 0.875 | 0.267 |
| 75  | 31.0 | 307.0 | 0.670 | 2.067 | 9  | 0.974 | 0.927 | 0.729 | 0.000 | 0.546 | 0.000 | 0.365 |
| 76  | 14.8 | 192.0 | 0.720 | 1.105 | 6  | 0.122 | 0.206 | 0.215 | 0.895 | 0.671 | 0.811 | 0.302 |
| 77  | 3.5  | 12.0  | 1.200 | 1.000 | 6  | 0.138 | 0.000 | 0.000 | 1.199 | 0.769 | 0.942 | 0.013 |
| 78  | 9.2  | 69.0  | 0.302 | 1.000 | 5  | 0.011 | 0.000 | 0.000 | 1.096 | 0.757 | 0.890 | 0.148 |
| 79  | 14.1 | 173.5 | 0.927 | 1.053 | 7  | 0.541 | 0.099 | 0.100 | 0.826 | 0.604 | 0.804 | 0.268 |
| 80  | 12.7 | 118.0 | 0.728 | 1.125 | 6  | 0.123 | 0.242 | 0.262 | 0.994 | 0.666 | 0.849 | 0.231 |
| 81  | 14.0 | 146.0 | 0.589 | 1.077 | 8  | 0.914 | 0.147 | 0.122 | 0.724 | 0.569 | 0.800 | 0.274 |
| 82  | 9.9  | 80.0  | 0.815 | 1.000 | 8  | 0.929 | 0.000 | 0.000 | 0.811 | 0.581 | 0.826 | 0.182 |
| 83  | 2.8  | 8.0   | 1.000 | 1.000 | 4  | 0.000 | 0.000 | 0.000 | 1.345 | 0.845 | 0.926 | 0.004 |
| 84  | 15.0 | 158.5 | 1.225 | 1.154 | 8  | 0.904 | 0.285 | 0.267 | 0.776 | 0.575 | 0.814 | 0.299 |
| 85  | 17.7 | 177.5 | 0.696 | 1.563 | 4  | 0.000 | 0.998 | 1.009 | 0.905 | 0.767 | 0.818 | 0.276 |
| 86  | 14.3 | 144.5 | 0.689 | 1.143 | 5  | 0.010 | 0.277 | 0.284 | 0.996 | 0.711 | 0.847 | 0.262 |
| 87  | 17.7 | 250.5 | 0.842 | 1.077 | 4  | 0.000 | 0.139 | 0.155 | 1.046 | 0.710 | 0.791 | 0.304 |
| 88  | 14.2 | 146.5 | 0.523 | 1.098 | 7  | 0.552 | 0.182 | 0.174 | 0.814 | 0.621 | 0.840 | 0.248 |
| 89  | 30.7 | 371.0 | 0.614 | 1.770 | 8  | 0.957 | 0.961 | 0.844 | 0.337 | 0.640 | 0.668 | 0.285 |
| 90  | 1.4  | 2.0   | inf   | 1.000 | 4  | 0.001 | 0.000 | 0.000 | 1.788 | 1.364 | 1.268 | 0.000 |
| 91  | 8.5  | 59.5  | 0.452 | 1.091 | 6  | 0.129 | 0.181 | 0.195 | 0.992 | 0.695 | 0.875 | 0.138 |
| 92  | 14.0 | 162.5 | 0.812 | 1.000 | 8  | 0.916 | 0.000 | 0.000 | 0.795 | 0.582 | 0.801 | 0.220 |
| 93  | 13.0 | 126.5 | 0.676 | 1.079 | 8  | 0.941 | 0.150 | 0.128 | 0.808 | 0.567 | 0.806 | 0.225 |
| 94  | 15.3 | 180.5 | 0.976 | 1.016 | 7  | 0.559 | 0.031 | 0.029 | 0.867 | 0.638 | 0.812 | 0.275 |
| 95  | 16.0 | 177.0 | 0.937 | 1.231 | 6  | 0.127 | 0.446 | 0.453 | 0.955 | 0.716 | 0.857 | 0.315 |
| 96  | 14.8 | 171.0 | 0.820 | 1.167 | 8  | 0.905 | 0.310 | 0.284 | 0.721 | 0.591 | 0.789 | 0.202 |
| 97  | 14.1 | 136.0 | 0.856 | 1.250 | 6  | 0.126 | 0.475 | 0.521 | 0.934 | 0.677 | 0.833 | 0.120 |
| 98  | 16.0 | 172.0 | 0.861 | 1.231 | 7  | 0.559 | 0.452 | 0.410 | 0.844 | 0.653 | 0.891 | 0.166 |
| 99  | 15.6 | 196.0 | 1.002 | 1.100 | 6  | 0.122 | 0.191 | 0.204 | 0.916 | 0.651 | 0.806 | 0.236 |
| 100 | 13.6 | 122.0 | 0.659 | 1.159 | 7  | 0.576 | 0.314 | 0.298 | 0.889 | 0.651 | 0.880 | 0.127 |
| 101 | 13.0 | 122.5 | 0.921 | 1.182 | 7  | 0.567 | 0.359 | 0.338 | 0.869 | 0.658 | 0.850 | 0.207 |
| 102 | 14.8 | 173.0 | 0.744 | 1.031 | 6  | 0.123 | 0.061 | 0.064 | 0.915 | 0.671 | 0.846 | 0.186 |
| 103 | 17.5 | 156.5 | 0.813 | 1.514 | 7  | 0.601 | 0.930 | 0.985 | 0.833 | 0.687 | 0.887 | 0.205 |
| 104 | 47.1 | 734.5 | 0.654 | 1.477 | 15 | 0.905 | 0.318 | 0.185 | 0.142 | 0.146 | 0.283 | 0.371 |
| 105 | 22.9 | 195.5 | 0.808 | 1.584 | 5  | 0.011 | 0.954 | 1.006 | 0.843 | 0.804 | 0.935 | 0.209 |

S3\_5. Nano-descriptors calculated for TEM image in Figure 1e (Dogbone NPs)

| ID | Size | SurfaceArea | Curvature | AspectRatio | CornerCount | Circle | Rod   | Dogbone | Triangle | Square | Hexagon | AgglomerationState |
|----|------|-------------|-----------|-------------|-------------|--------|-------|---------|----------|--------|---------|--------------------|
| 1  | 4.0  | 2.0         | 0.250     | 4.000       | 4           | 0.001  | 0.000 | 0.000   | 0.000    | 1.435  | 0.000   | 0.000              |
| 2  | 6.0  | 14.5        | 1.192     | 2.000       | 4           | 0.000  | 1.241 | 1.347   | 0.000    | 0.916  | 0.000   | 0.007              |
| 3  | 1.4  | 2.0         |           | 1.000       | 4           | 0.001  | 0.000 | 0.000   | 1.788    | 1.364  | 1.268   | 0.000              |
| 4  | 4.9  | 12.0        | 1.177     | 1.375       | 4           | 0.000  | 0.868 | 1.070   | 1.420    | 0.928  | 1.054   | 0.015              |
| 5  | 7.0  | 12.0        | 0.857     | 3.500       | 4           | 0.000  | 1.353 | 1.456   | 0.000    | 1.167  | 0.000   | 0.035              |
| 6  | 21.8 | 48.0        | 0.163     | 3.655       | 4           | 0.000  | 0.888 | 0.892   | 0.000    | 0.884  | 0.000   | 0.058              |
| 7  | 7.0  | 23.5        | 0.619     | 1.400       | 4           | 0.000  | 0.856 | 1.006   | 1.220    | 0.840  | 0.953   | 0.082              |
| 8  | 8.2  | 14.0        | 0.849     | 3.091       | 4           | 0.000  | 1.205 | 1.510   | 0.000    | 1.030  | 0.000   | 0.043              |
| 9  | 23.0 | 50.0        | 0.134     | 4.524       | 4           | 0.000  | 0.000 | 0.000   | 0.000    | 0.774  | 0.000   | 0.162              |
| 10 | 10.0 | 38.5        | 0.942     | 1.821       | 7           | 0.655  | 1.151 | 1.084   | 0.353    | 0.763  | 0.622   | 0.115              |
| 11 | 6.0  | 5.0         | 0.411     | 3.000       | 4           | 0.001  | 1.397 | 2.188   | 0.000    | 1.220  | 0.000   | 0.006              |
| 12 | 9.0  | 44.5        | 0.589     | 1.125       | 4           | 0.000  | 0.266 | 0.299   | 1.210    | 0.846  | 0.978   | 0.118              |
| 13 | 16.1 | 71.0        | 0.963     | 2.342       | 7           | 0.681  | 1.119 | 0.980   | 0.000    | 0.813  | 0.000   | 0.044              |
| 14 | 7.8  | 27.5        | 0.518     | 1.375       | 4           | 0.000  | 0.790 | 0.955   | 1.286    | 0.902  | 1.021   | 0.053              |
| 15 | 27.6 | 78.0        | 0.386     | 2.810       | 4           | 0.000  | 0.937 | 1.358   | 0.000    | 0.866  | 0.000   | 0.319              |
| 16 | 14.1 | 78.5        | 0.641     | 1.933       | 7           | 0.629  | 1.098 | 0.985   | 0.124    | 0.736  | 0.219   | 0.121              |
| 17 | 22.5 | 87.5        | 0.395     | 2.361       | 4           | 0.000  | 1.017 | 1.258   | 0.000    | 0.786  | 0.000   | 0.228              |
| 18 | 34.9 | 153.5       | 0.073     | 1.787       | 4           | 0.000  | 0.899 | 1.251   | 0.519    | 0.719  | 0.556   | 0.350              |
| 19 | 4.2  | 10.5        | 1.030     | 1.200       | 4           | 0.000  | 0.478 | 0.583   | 1.406    | 0.944  | 1.079   | 0.008              |
| 20 | 4.9  | 13.0        | 1.069     | 1.400       | 4           | 0.000  | 0.893 | 1.146   | 1.460    | 0.963  | 1.061   | 0.019              |

|     |      |        |       |       |    |       |       |       |       |       |       |       |
|-----|------|--------|-------|-------|----|-------|-------|-------|-------|-------|-------|-------|
| 21  | 31.0 | 257.0  | 0.087 | 1.542 | 10 | 1.085 | 0.892 | 0.664 | 0.502 | 0.570 | 0.804 | 0.452 |
| 22  | 11.6 | 17.5   | 0.750 | 4.762 | 4  | 0.000 | 0.000 | 0.000 | 0.000 | 0.821 | 0.000 | 0.039 |
| 23  | 8.0  | 16.0   | 1.000 | 2.667 | 4  | 0.000 | 1.252 | 1.520 | 0.000 | 1.160 | 0.000 | 0.062 |
| 24  | 2.1  | 4.0    |       | 1.000 | 4  | 0.000 | 0.000 | 0.000 | 1.627 | 1.039 | 1.111 | 0.007 |
| 25  | 22.6 | 127.0  | 0.538 | 2.814 | 8  | 1.103 | 1.054 | 0.842 | 0.000 | 0.765 | 0.000 | 0.223 |
| 26  | 13.6 | 38.0   | 0.632 | 1.750 | 4  | 0.000 | 1.286 | 1.439 | 0.726 | 1.186 | 1.009 | 0.165 |
| 27  | 21.5 | 72.5   | 0.119 | 2.615 | 4  | 0.000 | 1.053 | 1.302 | 0.000 | 0.991 | 0.000 | 0.187 |
| 28  | 12.0 | 63.0   | 0.991 | 1.714 | 4  | 0.000 | 1.085 | 1.160 | 0.666 | 0.832 | 0.917 | 0.465 |
| 29  | 12.0 | 37.0   | 0.137 | 2.000 | 4  | 0.000 | 1.126 | 1.292 | 0.000 | 1.018 | 0.000 | 0.094 |
| 30  | 12.7 | 21.0   | 0.820 | 6.000 | 4  | 0.000 | 0.000 | 0.000 | 0.000 | 0.781 | 0.000 | 0.070 |
| 31  | 15.2 | 87.0   | 1.342 | 2.000 | 7  | 0.609 | 1.106 | 0.997 | 0.000 | 0.713 | 0.000 | 0.206 |
| 32  | 18.9 | 60.5   | 0.777 | 1.856 | 4  | 0.000 | 1.094 | 1.272 | 0.371 | 0.862 | 0.443 | 0.178 |
| 33  | 11.0 | 58.0   | 1.161 | 1.571 | 6  | 0.141 | 1.097 | 1.075 | 0.894 | 0.775 | 0.981 | 0.187 |
| 34  | 39.0 | 607.0  | 0.275 | 1.393 | 13 | 0.968 | 0.402 | 0.269 | 0.266 | 0.262 | 0.484 | 0.787 |
| 35  | 8.5  | 55.0   | 0.894 | 1.000 | 6  | 0.139 | 0.000 | 0.000 | 1.036 | 0.784 | 0.909 | 0.097 |
| 36  | 19.2 | 90.0   | 0.465 | 3.097 | 7  | 0.709 | 1.147 | 0.987 | 0.000 | 0.859 | 0.000 | 0.222 |
| 37  | 22.6 | 129.5  | 0.363 | 2.758 | 8  | 1.112 | 1.062 | 0.831 | 0.000 | 0.766 | 0.000 | 0.223 |
| 38  | 13.1 | 48.0   | 1.825 | 2.587 | 9  | 1.169 | 1.012 | 0.866 | 0.000 | 0.703 | 0.000 | 0.091 |
| 39  | 17.0 | 107.5  | 0.472 | 1.889 | 6  | 0.140 | 1.094 | 0.967 | 0.215 | 0.759 | 0.370 | 0.257 |
| 40  | 17.0 | 85.0   | 0.423 | 3.000 | 6  | 0.135 | 1.150 | 1.051 | 0.000 | 0.755 | 0.000 | 0.231 |
| 41  | 6.4  | 23.5   | 0.805 | 1.500 | 5  | 0.012 | 1.173 | 1.193 | 1.176 | 0.884 | 0.960 | 0.016 |
| 42  | 13.5 | 68.5   | 0.265 | 1.855 | 6  | 0.144 | 1.079 | 1.098 | 0.305 | 0.842 | 0.497 | 0.231 |
| 43  | 38.9 | 200.5  | 0.581 | 4.583 | 6  | 0.119 | 0.000 | 0.000 | 0.000 | 0.644 | 0.000 | 0.374 |
| 44  | 33.1 | 246.0  | 0.141 | 1.762 | 7  | 0.698 | 1.052 | 0.967 | 0.434 | 0.887 | 0.829 | 0.348 |
| 45  | 8.5  | 37.0   | 0.964 | 1.500 | 6  | 0.145 | 1.049 | 1.123 | 1.101 | 0.798 | 1.004 | 0.200 |
| 46  | 64.6 | 1079.5 | 0.211 | 1.961 | 2  | 0.000 | 0.832 | 1.006 | 0.078 | 0.690 | 0.093 | 0.661 |
| 47  | 16.0 | 80.0   | 0.413 | 2.286 | 9  | 1.121 | 1.006 | 0.830 | 0.000 | 0.633 | 0.000 | 0.177 |
| 48  | 14.3 | 25.5   | 0.890 | 4.259 | 4  | 0.000 | 0.000 | 0.000 | 0.000 | 0.822 | 0.000 | 0.079 |
| 49  | 14.8 | 34.0   | 1.151 | 4.125 | 4  | 0.000 | 0.000 | 0.000 | 0.000 | 0.919 | 0.000 | 0.155 |
| 50  | 19.2 | 122.0  | 0.230 | 2.263 | 6  | 0.137 | 1.139 | 1.007 | 0.000 | 0.795 | 0.000 | 0.209 |
| 51  | 19.4 | 106.0  | 1.383 | 2.581 | 8  | 1.079 | 1.043 | 0.836 | 0.000 | 0.717 | 0.000 | 0.344 |
| 52  | 15.5 | 80.5   | 0.717 | 2.207 | 8  | 1.048 | 1.015 | 0.916 | 0.000 | 0.702 | 0.000 | 0.361 |
| 53  | 18.0 | 66.0   | 0.306 | 1.636 | 4  | 0.000 | 1.166 | 1.314 | 0.944 | 1.065 | 1.110 | 0.037 |
| 54  | 14.4 | 87.0   | 0.291 | 1.953 | 4  | 0.000 | 0.946 | 1.130 | 0.108 | 0.802 | 0.137 | 0.293 |
| 55  | 19.1 | 109.0  | 0.207 | 2.371 | 7  | 0.685 | 1.074 | 0.937 | 0.000 | 0.844 | 0.000 | 0.248 |
| 56  | 9.2  | 36.0   | 0.727 | 1.083 | 4  | 0.000 | 0.180 | 0.221 | 1.252 | 0.945 | 0.982 | 0.119 |
| 57  | 38.4 | 423.0  | 0.027 | 1.297 | 15 | 0.915 | 0.190 | 0.116 | 0.143 | 0.133 | 0.286 | 0.394 |
| 58  | 17.7 | 72.0   | 0.961 | 3.146 | 6  | 0.147 | 1.134 | 1.126 | 0.000 | 0.850 | 0.000 | 0.272 |
| 59  | 13.9 | 64.5   | 0.303 | 2.067 | 6  | 0.146 | 1.077 | 1.113 | 0.000 | 0.829 | 0.000 | 0.220 |
| 60  | 4.2  | 8.0    | 0.784 | 1.500 | 4  | 0.000 | 1.208 | 1.626 | 1.559 | 1.010 | 1.115 | 0.012 |
| 61  | 21.0 | 124.5  | 0.341 | 2.333 | 8  | 1.163 | 1.062 | 0.924 | 0.000 | 0.766 | 0.000 | 0.274 |
| 62  | 9.4  | 54.0   | 0.252 | 1.313 | 4  | 0.000 | 0.643 | 0.704 | 1.144 | 0.790 | 0.856 | 0.216 |
| 63  | 5.7  | 24.5   | 0.595 | 1.143 | 5  | 0.011 | 0.327 | 0.349 | 1.171 | 0.776 | 0.894 | 0.178 |
| 64  | 5.0  | 13.0   | 1.275 | 1.667 | 4  | 0.000 | 1.171 | 1.480 | 0.998 | 0.931 | 1.035 | 0.061 |
| 65  | 27.0 | 210.5  | 0.224 | 1.910 | 12 | 0.924 | 0.556 | 0.451 | 0.065 | 0.307 | 0.153 | 0.377 |
| 66  | 18.7 | 120.0  | 0.076 | 1.878 | 8  | 1.039 | 1.030 | 0.883 | 0.190 | 0.704 | 0.402 | 0.447 |
| 67  | 9.2  | 46.5   | 0.383 | 1.300 | 8  | 1.004 | 0.655 | 0.584 | 0.873 | 0.643 | 0.900 | 0.316 |
| 68  | 17.0 | 79.5   | 0.513 | 2.833 | 9  | 1.172 | 1.015 | 0.837 | 0.000 | 0.703 | 0.000 | 0.246 |
| 69  | 17.0 | 87.5   | 0.247 | 2.429 | 7  | 0.677 | 1.092 | 0.957 | 0.000 | 0.838 | 0.000 | 0.327 |
| 70  | 7.2  | 12.0   | 0.824 | 2.667 | 4  | 0.000 | 1.296 | 1.517 | 0.000 | 1.108 | 0.000 | 0.067 |
| 71  | 3.5  | 12.0   | 1.455 | 1.000 | 6  | 0.138 | 0.000 | 0.000 | 1.181 | 0.769 | 0.948 | 0.096 |
| 72  | 20.9 | 264.0  | 0.027 | 1.218 | 8  | 0.903 | 0.412 | 0.376 | 0.782 | 0.543 | 0.766 | 0.314 |
| 73  | 29.6 | 180.0  | 0.333 | 1.711 | 6  | 0.164 | 1.167 | 1.122 | 0.602 | 1.001 | 1.077 | 0.410 |
| 74  | 8.5  | 48.0   | 0.306 | 1.200 | 5  | 0.011 | 0.425 | 0.475 | 1.114 | 0.782 | 0.935 | 0.187 |
| 75  | 4.9  | 19.5   | 1.603 | 1.167 | 7  | 0.625 | 0.356 | 0.374 | 1.006 | 0.711 | 0.918 | 0.139 |
| 76  | 13.3 | 67.5   | 1.271 | 1.929 | 8  | 1.031 | 1.049 | 0.932 | 0.115 | 0.670 | 0.230 | 0.174 |
| 77  | 9.2  | 45.0   | 0.876 | 1.182 | 7  | 0.658 | 0.427 | 0.370 | 1.019 | 0.730 | 1.038 | 0.276 |
| 78  | 5.7  | 28.0   | 0.898 | 1.000 | 7  | 0.620 | 0.000 | 0.000 | 0.998 | 0.720 | 0.897 | 0.199 |
| 79  | 9.0  | 43.5   | 1.253 | 1.500 | 7  | 0.623 | 1.082 | 0.991 | 0.945 | 0.726 | 0.947 | 0.262 |
| 80  | 19.0 | 82.0   | 0.346 | 2.714 | 7  | 0.716 | 1.137 | 1.058 | 0.000 | 0.851 | 0.000 | 0.321 |
| 81  | 23.1 | 123.0  | 0.285 | 2.808 | 8  | 1.081 | 1.045 | 0.946 | 0.000 | 0.749 | 0.000 | 0.339 |
| 82  | 32.8 | 362.5  | 0.223 | 1.588 | 13 | 1.030 | 0.518 | 0.334 | 0.221 | 0.273 | 0.506 | 0.372 |
| 83  | 31.2 | 291.5  | 0.113 | 1.655 | 12 | 0.944 | 0.610 | 0.465 | 0.238 | 0.327 | 0.547 | 0.399 |
| 84  | 6.4  | 22.5   | 1.545 | 1.500 | 5  | 0.012 | 1.213 | 1.311 | 1.221 | 0.836 | 0.961 | 0.129 |
| 85  | 13.0 | 44.0   | 0.710 | 2.234 | 8  | 1.190 | 1.129 | 0.947 | 0.000 | 0.797 | 0.000 | 0.185 |
| 86  | 11.2 | 21.0   | 0.921 | 3.571 | 4  | 0.000 | 1.172 | 1.269 | 0.000 | 0.967 | 0.000 | 0.023 |
| 87  | 4.9  | 16.0   | 1.315 | 1.400 | 5  | 0.012 | 0.962 | 1.030 | 1.273 | 0.880 | 0.957 | 0.067 |
| 88  | 24.0 | 160.0  | 0.269 | 1.964 | 7  | 0.652 | 1.090 | 0.988 | 0.067 | 0.758 | 0.122 | 0.276 |
| 89  | 17.3 | 90.5   | 0.552 | 2.449 | 8  | 1.115 | 1.088 | 0.893 | 0.000 | 0.715 | 0.000 | 0.258 |
| 90  | 6.4  | 19.0   | 1.416 | 1.800 | 4  | 0.000 | 1.039 | 1.317 | 0.517 | 0.886 | 0.637 | 0.132 |
| 91  | 21.0 | 142.5  | 0.000 | 2.195 | 8  | 1.077 | 1.037 | 0.858 | 0.000 | 0.723 | 0.000 | 0.315 |
| 92  | 20.6 | 95.5   | 1.416 | 3.308 | 7  | 0.622 | 1.129 | 0.983 | 0.000 | 0.687 | 0.000 | 0.270 |
| 93  | 16.3 | 86.0   | 1.326 | 2.875 | 5  | 0.011 | 1.064 | 1.095 | 0.000 | 0.766 | 0.000 | 0.304 |
| 94  | 27.0 | 159.5  | 0.512 | 2.204 | 11 | 1.077 | 0.776 | 0.554 | 0.000 | 0.445 | 0.000 | 0.431 |
| 95  | 16.0 | 97.5   | 0.140 | 1.940 | 7  | 0.640 | 1.072 | 0.983 | 0.106 | 0.742 | 0.206 | 0.310 |
| 96  | 9.2  | 58.5   | 0.457 | 1.300 | 8  | 0.956 | 0.602 | 0.536 | 0.783 | 0.616 | 0.818 | 0.239 |
| 97  | 5.7  | 23.0   | 0.648 | 1.333 | 5  | 0.012 | 0.747 | 0.808 | 1.239 | 0.835 | 0.927 | 0.161 |
| 98  | 54.7 | 771.5  | 0.015 | 1.557 | 12 | 0.958 | 0.627 | 0.455 | 0.317 | 0.323 | 0.558 | 0.698 |
| 99  | 14.0 | 76.0   | 0.400 | 1.750 | 8  | 1.086 | 1.094 | 0.895 | 0.393 | 0.706 | 0.856 | 0.221 |
| 100 | 25.4 | 145.0  | 0.350 | 2.922 | 9  | 1.127 | 0.973 | 0.806 | 0.000 | 0.673 | 0.000 | 0.311 |
| 101 | 7.8  | 31.0   | 1.681 | 1.571 | 6  | 0.141 | 1.207 | 1.144 | 0.968 | 0.806 | 0.975 | 0.150 |
| 102 | 18.7 | 91.5   | 0.506 | 2.493 | 8  | 1.093 | 1.089 | 0.898 | 0.000 | 0.696 | 0.000 | 0.358 |

|     |      |       |       |       |    |       |       |       |       |       |       |       |
|-----|------|-------|-------|-------|----|-------|-------|-------|-------|-------|-------|-------|
| 103 | 4.2  | 12.0  | 1.177 | 1.500 | 4  | 0.000 | 1.128 | 1.315 | 1.353 | 0.867 | 0.923 | 0.080 |
| 104 | 16.3 | 72.0  | 0.325 | 3.286 | 5  | 0.011 | 1.165 | 1.129 | 0.000 | 0.779 | 0.000 | 0.272 |
| 105 | 9.9  | 72.5  | 0.382 | 1.273 | 5  | 0.011 | 0.573 | 0.598 | 1.077 | 0.790 | 0.850 | 0.342 |
| 106 | 6.4  | 24.0  | 1.488 | 1.286 | 7  | 0.654 | 0.686 | 0.634 | 1.005 | 0.775 | 1.019 | 0.137 |
| 107 | 18.4 | 100.5 | 0.124 | 2.284 | 9  | 1.156 | 1.032 | 0.828 | 0.000 | 0.643 | 0.000 | 0.353 |
| 108 | 14.8 | 56.0  | 1.014 | 2.750 | 8  | 1.094 | 1.130 | 0.951 | 0.000 | 0.729 | 0.000 | 0.351 |
| 109 | 19.4 | 102.5 | 0.175 | 2.276 | 6  | 0.149 | 1.129 | 1.126 | 0.000 | 0.900 | 0.000 | 0.258 |
| 110 | 16.4 | 101.5 | 0.467 | 1.722 | 8  | 1.072 | 1.044 | 0.923 | 0.456 | 0.640 | 0.868 | 0.332 |
| 111 | 32.1 | 423.0 | 0.347 | 1.217 | 11 | 0.898 | 0.307 | 0.234 | 0.442 | 0.368 | 0.595 | 0.342 |
| 112 | 17.3 | 87.0  | 0.456 | 2.596 | 6  | 0.142 | 1.164 | 1.091 | 0.000 | 0.828 | 0.000 | 0.313 |
| 113 | 2.8  | 5.5   | 0.870 | 1.333 | 4  | 0.000 | 0.880 | 1.086 | 1.630 | 1.026 | 1.063 | 0.019 |
| 114 | 36.0 | 237.5 | 0.028 | 2.511 | 9  | 1.019 | 0.853 | 0.800 | 0.000 | 0.553 | 0.000 | 0.412 |
| 115 | 15.8 | 87.0  | 0.317 | 2.053 | 7  | 0.632 | 1.057 | 1.005 | 0.000 | 0.736 | 0.000 | 0.301 |
| 116 | 7.8  | 43.0  | 0.285 | 1.222 | 5  | 0.011 | 0.472 | 0.524 | 1.132 | 0.806 | 0.902 | 0.224 |
| 117 | 19.6 | 93.5  | 0.696 | 3.000 | 7  | 0.673 | 1.095 | 1.013 | 0.000 | 0.804 | 0.000 | 0.265 |
| 118 | 34.3 | 352.0 | 0.301 | 1.574 | 16 | 1.018 | 0.255 | 0.151 | 0.094 | 0.114 | 0.250 | 0.505 |
| 119 | 10.6 | 58.5  | 0.289 | 1.500 | 5  | 0.011 | 0.944 | 1.095 | 1.076 | 0.795 | 0.943 | 0.197 |
| 120 | 17.0 | 82.5  | 0.503 | 2.833 | 7  | 0.714 | 1.135 | 0.950 | 0.000 | 0.907 | 0.000 | 0.261 |
| 121 | 8.5  | 54.0  | 0.460 | 1.200 | 6  | 0.131 | 0.408 | 0.401 | 1.002 | 0.715 | 0.858 | 0.269 |
| 122 | 17.2 | 73.0  | 1.198 | 2.836 | 7  | 0.704 | 1.150 | 1.002 | 0.000 | 0.839 | 0.000 | 0.132 |
| 123 | 31.8 | 182.5 | 0.120 | 2.373 | 9  | 0.938 | 0.877 | 0.779 | 0.000 | 0.557 | 0.000 | 0.368 |
| 124 | 15.2 | 76.0  | 0.360 | 2.267 | 6  | 0.142 | 1.170 | 1.020 | 0.000 | 0.815 | 0.000 | 0.347 |
| 125 | 18.0 | 87.0  | 1.022 | 2.691 | 8  | 1.056 | 1.095 | 0.931 | 0.000 | 0.687 | 0.000 | 0.224 |
| 126 | 11.6 | 51.5  | 0.839 | 2.100 | 7  | 0.625 | 1.152 | 1.053 | 0.000 | 0.741 | 0.000 | 0.235 |
| 127 | 16.5 | 63.0  | 1.910 | 3.082 | 8  | 1.156 | 1.132 | 0.931 | 0.000 | 0.754 | 0.000 | 0.315 |
| 128 | 21.8 | 218.0 | 0.075 | 1.386 | 11 | 0.947 | 0.560 | 0.411 | 0.451 | 0.385 | 0.645 | 0.366 |
| 129 | 17.0 | 96.0  | 0.099 | 2.182 | 4  | 0.000 | 1.019 | 1.095 | 0.000 | 0.774 | 0.000 | 0.346 |
| 130 | 35.5 | 410.0 | 0.232 | 1.551 | 17 | 0.904 | 0.167 | 0.100 | 0.063 | 0.072 | 0.159 | 0.343 |
| 131 | 14.0 | 62.5  | 0.721 | 2.096 | 6  | 0.139 | 1.112 | 1.110 | 0.000 | 0.777 | 0.000 | 0.215 |
| 132 | 18.1 | 89.0  | 0.913 | 2.591 | 6  | 0.141 | 1.148 | 1.095 | 0.000 | 0.786 | 0.000 | 0.362 |
| 133 | 21.0 | 110.0 | 0.520 | 2.625 | 8  | 1.142 | 1.072 | 0.858 | 0.000 | 0.778 | 0.000 | 0.263 |
| 134 | 26.0 | 241.5 | 0.338 | 1.556 | 14 | 0.910 | 0.428 | 0.269 | 0.179 | 0.179 | 0.350 | 0.538 |
| 135 | 4.2  | 16.0  | 1.333 | 1.000 | 6  | 0.139 | 0.000 | 0.000 | 1.211 | 0.793 | 0.965 | 0.063 |
| 136 | 4.9  | 20.0  | 1.429 | 1.000 | 6  | 0.140 | 0.000 | 0.000 | 1.170 | 0.774 | 0.990 | 0.138 |
| 137 | 12.5 | 46.5  | 1.838 | 2.545 | 5  | 0.012 | 1.115 | 1.190 | 0.000 | 0.859 | 0.000 | 0.189 |
| 138 | 19.0 | 78.5  | 0.116 | 3.062 | 9  | 1.221 | 0.974 | 0.860 | 0.000 | 0.692 | 0.000 | 0.277 |
| 139 | 5.7  | 25.5  | 1.015 | 1.143 | 6  | 0.135 | 0.297 | 0.350 | 1.152 | 0.738 | 0.915 | 0.141 |
| 140 | 12.7 | 47.5  | 0.048 | 2.595 | 4  | 0.000 | 1.154 | 1.237 | 0.000 | 0.850 | 0.000 | 0.214 |
| 141 | 13.3 | 80.5  | 0.444 | 1.667 | 8  | 1.017 | 1.008 | 0.864 | 0.548 | 0.671 | 0.920 | 0.231 |
| 142 | 28.3 | 160.0 | 0.652 | 2.540 | 6  | 0.160 | 1.160 | 1.064 | 0.000 | 0.901 | 0.000 | 0.434 |
| 143 | 20.5 | 101.5 | 0.070 | 3.222 | 4  | 0.000 | 1.115 | 1.162 | 0.000 | 0.745 | 0.000 | 0.305 |
| 144 | 19.4 | 101.0 | 0.185 | 2.482 | 8  | 1.148 | 1.075 | 0.946 | 0.000 | 0.797 | 0.000 | 0.324 |
| 145 | 8.5  | 41.0  | 0.954 | 1.500 | 6  | 0.139 | 1.147 | 1.160 | 1.057 | 0.799 | 0.950 | 0.212 |
| 146 | 8.5  | 59.0  | 0.317 | 1.200 | 4  | 0.000 | 0.368 | 0.437 | 1.097 | 0.729 | 0.800 | 0.276 |
| 147 | 25.8 | 212.0 | 0.086 | 1.599 | 7  | 0.644 | 1.072 | 0.977 | 0.700 | 0.786 | 0.961 | 0.368 |
| 148 | 15.1 | 80.0  | 0.252 | 2.058 | 4  | 0.000 | 1.090 | 1.117 | 0.000 | 0.819 | 0.000 | 0.252 |
| 149 | 14.2 | 61.5  | 0.227 | 2.081 | 8  | 1.136 | 1.095 | 0.935 | 0.000 | 0.740 | 0.000 | 0.343 |
| 150 | 8.5  | 37.0  | 0.964 | 1.500 | 6  | 0.146 | 1.180 | 1.121 | 1.102 | 0.824 | 1.018 | 0.244 |
| 151 | 19.8 | 175.0 | 0.305 | 1.312 | 14 | 0.965 | 0.265 | 0.166 | 0.207 | 0.196 | 0.367 | 0.373 |
| 152 | 17.4 | 78.5  | 1.056 | 2.600 | 6  | 0.156 | 1.160 | 1.068 | 0.000 | 0.869 | 0.000 | 0.306 |
| 153 | 7.1  | 32.5  | 0.110 | 1.429 | 5  | 0.011 | 0.812 | 1.060 | 1.105 | 0.800 | 0.911 | 0.167 |
| 154 | 19.2 | 108.5 | 0.776 | 2.529 | 7  | 0.624 | 1.042 | 0.953 | 0.000 | 0.720 | 0.000 | 0.234 |
| 155 | 17.8 | 73.5  | 1.223 | 3.048 | 5  | 0.011 | 1.183 | 1.169 | 0.000 | 0.809 | 0.000 | 0.206 |
| 156 | 16.9 | 84.0  | 0.061 | 2.231 | 6  | 0.142 | 1.154 | 1.108 | 0.000 | 0.812 | 0.000 | 0.300 |
| 157 | 2.8  | 8.0   | 1.000 | 1.000 | 4  | 0.000 | 0.000 | 0.000 | 1.345 | 0.845 | 0.926 | 0.049 |
| 158 | 5.7  | 27.0  | 0.806 | 1.000 | 6  | 0.139 | 0.000 | 0.000 | 1.128 | 0.768 | 0.926 | 0.117 |
| 159 | 15.4 | 68.0  | 0.965 | 2.255 | 8  | 1.078 | 1.072 | 0.976 | 0.000 | 0.699 | 0.000 | 0.236 |
| 160 | 6.4  | 26.0  | 1.612 | 1.286 | 6  | 0.142 | 0.630 | 0.721 | 1.155 | 0.775 | 0.973 | 0.072 |
| 161 | 28.5 | 151.5 | 1.105 | 3.398 | 7  | 0.623 | 1.098 | 1.010 | 0.000 | 0.700 | 0.000 | 0.388 |
| 162 | 11.3 | 73.0  | 0.162 | 1.600 | 4  | 0.000 | 0.914 | 1.099 | 0.927 | 0.792 | 0.852 | 0.329 |
| 163 | 14.0 | 95.0  | 0.556 | 1.556 | 7  | 0.605 | 1.063 | 0.950 | 0.785 | 0.672 | 0.929 | 0.348 |
| 164 | 18.3 | 106.0 | 0.089 | 2.158 | 7  | 0.634 | 1.116 | 0.929 | 0.000 | 0.756 | 0.000 | 0.341 |
| 165 | 8.5  | 47.5  | 0.169 | 1.091 | 6  | 0.134 | 0.203 | 0.206 | 1.035 | 0.707 | 0.917 | 0.212 |
| 166 | 21.2 | 110.0 | 0.103 | 2.373 | 8  | 1.132 | 1.033 | 0.867 | 0.000 | 0.753 | 0.000 | 0.298 |
| 167 | 18.5 | 75.0  | 0.083 | 3.141 | 5  | 0.012 | 1.154 | 1.186 | 0.000 | 0.868 | 0.000 | 0.336 |
| 168 | 15.9 | 79.0  | 0.233 | 2.306 | 10 | 1.070 | 0.893 | 0.676 | 0.000 | 0.541 | 0.000 | 0.310 |
| 169 | 8.2  | 49.5  | 0.352 | 1.040 | 5  | 0.011 | 0.082 | 0.094 | 1.112 | 0.752 | 0.884 | 0.222 |
| 170 | 8.5  | 53.0  | 0.293 | 1.200 | 4  | 0.000 | 0.406 | 0.473 | 1.110 | 0.794 | 0.827 | 0.162 |
| 171 | 13.2 | 62.5  | 1.003 | 2.088 | 8  | 1.069 | 1.033 | 0.915 | 0.000 | 0.712 | 0.000 | 0.310 |
| 172 | 19.2 | 75.5  | 1.963 | 3.667 | 6  | 0.135 | 0.758 | 0.754 | 0.000 | 0.749 | 0.000 | 0.236 |
| 173 | 13.1 | 59.5  | 0.905 | 2.083 | 6  | 0.145 | 1.148 | 1.130 | 0.000 | 0.850 | 0.000 | 0.270 |
| 174 | 2.8  | 8.0   | 1.000 | 1.000 | 4  | 0.000 | 0.000 | 0.000 | 1.345 | 0.845 | 0.926 | 0.045 |
| 175 | 18.7 | 111.5 | 0.339 | 2.453 | 7  | 0.617 | 1.054 | 0.975 | 0.000 | 0.697 | 0.000 | 0.259 |
| 176 | 20.3 | 99.0  | 0.336 | 3.193 | 5  | 0.011 | 1.147 | 1.127 | 0.000 | 0.801 | 0.000 | 0.295 |
| 177 | 17.2 | 77.5  | 0.182 | 3.234 | 4  | 0.000 | 1.097 | 1.147 | 0.000 | 0.787 | 0.000 | 0.226 |
| 178 | 17.5 | 91.5  | 0.252 | 2.625 | 4  | 0.000 | 1.048 | 1.104 | 0.000 | 0.805 | 0.000 | 0.380 |
| 179 | 6.4  | 35.0  | 0.352 | 1.000 | 6  | 0.130 | 0.000 | 0.000 | 1.072 | 0.734 | 0.875 | 0.222 |
| 180 | 12.0 | 39.0  | 1.619 | 2.607 | 10 | 1.166 | 0.956 | 0.729 | 0.000 | 0.563 | 0.000 | 0.195 |
| 181 | 2.8  | 8.0   | 1.000 | 1.000 | 4  | 0.000 | 0.000 | 0.000 | 1.345 | 0.845 | 0.926 | 0.033 |
| 182 | 28.2 | 208.5 | 0.539 | 1.703 | 8  | 1.043 | 1.009 | 0.903 | 0.493 | 0.690 | 0.906 | 0.389 |
| 183 | 19.5 | 116.0 | 0.072 | 2.592 | 4  | 0.000 | 1.016 | 1.156 | 0.000 | 0.805 | 0.000 | 0.364 |
| 184 | 27.6 | 190.5 | 0.098 | 1.615 | 9  | 1.017 | 0.857 | 0.815 | 0.524 | 0.622 | 0.879 | 0.354 |



|     |      |       |       |        |    |       |       |       |       |       |       |       |
|-----|------|-------|-------|--------|----|-------|-------|-------|-------|-------|-------|-------|
| 185 | 12.4 | 42.5  | 0.654 | 2.564  | 6  | 0.148 | 1.217 | 1.166 | 0.000 | 0.832 | 0.000 | 0.221 |
| 186 | 18.0 | 123.5 | 0.666 | 1.286  | 11 | 1.100 | 0.456 | 0.320 | 0.472 | 0.455 | 0.751 | 0.391 |
| 187 | 13.6 | 63.0  | 1.082 | 2.130  | 8  | 1.050 | 1.008 | 0.977 | 0.000 | 0.655 | 0.000 | 0.202 |
| 188 | 17.9 | 83.0  | 0.045 | 3.090  | 4  | 0.000 | 1.080 | 1.136 | 0.000 | 0.803 | 0.000 | 0.348 |
| 189 | 4.2  | 12.0  | 1.177 | 1.500  | 4  | 0.000 | 1.128 | 1.315 | 1.353 | 0.867 | 0.923 | 0.073 |
| 190 | 11.5 | 42.0  | 0.906 | 2.214  | 6  | 0.158 | 1.233 | 1.154 | 0.000 | 0.905 | 0.000 | 0.286 |
| 191 | 3.5  | 12.0  | 1.200 | 1.000  | 6  | 0.138 | 0.000 | 0.000 | 1.199 | 0.769 | 0.942 | 0.086 |
| 192 | 19.2 | 96.5  | 0.043 | 2.830  | 6  | 0.137 | 1.123 | 1.054 | 0.000 | 0.743 | 0.000 | 0.340 |
| 193 | 17.8 | 87.0  | 0.216 | 2.624  | 8  | 1.018 | 1.080 | 0.914 | 0.000 | 0.647 | 0.000 | 0.236 |
| 194 | 4.9  | 16.0  | 1.315 | 1.400  | 5  | 0.012 | 0.847 | 1.047 | 1.241 | 0.843 | 0.956 | 0.119 |
| 195 | 17.7 | 88.5  | 0.079 | 2.778  | 5  | 0.011 | 1.143 | 1.126 | 0.000 | 0.809 | 0.000 | 0.282 |
| 196 | 2.8  | 8.0   | 1.000 | 1.000  | 4  | 0.000 | 0.000 | 0.000 | 1.345 | 0.845 | 0.926 | 0.063 |
| 197 | 5.7  | 24.5  | 1.732 | 1.143  | 6  | 0.138 | 0.313 | 0.340 | 1.124 | 0.754 | 0.953 | 0.121 |
| 198 | 18.6 | 91.5  | 0.261 | 3.165  | 6  | 0.133 | 1.148 | 1.121 | 0.000 | 0.761 | 0.000 | 0.317 |
| 199 | 26.7 | 238.5 | 0.155 | 1.598  | 5  | 0.010 | 0.921 | 1.066 | 0.826 | 0.719 | 0.854 | 0.303 |
| 200 | 20.6 | 108.0 | 0.587 | 2.742  | 7  | 0.671 | 1.048 | 0.953 | 0.000 | 0.873 | 0.000 | 0.312 |
| 201 | 7.8  | 30.0  | 1.627 | 1.571  | 7  | 0.651 | 1.068 | 1.130 | 0.854 | 0.750 | 0.968 | 0.107 |
| 202 | 4.9  | 17.0  | 1.397 | 1.400  | 6  | 0.141 | 0.835 | 0.969 | 1.145 | 0.782 | 0.935 | 0.173 |
| 203 | 9.0  | 40.5  | 1.111 | 1.500  | 8  | 1.027 | 1.024 | 0.998 | 0.828 | 0.645 | 0.917 | 0.324 |
| 204 | 18.8 | 93.0  | 0.524 | 2.848  | 7  | 0.606 | 1.150 | 1.060 | 0.000 | 0.694 | 0.000 | 0.263 |
| 205 | 22.8 | 161.5 | 0.081 | 1.889  | 11 | 1.004 | 0.697 | 0.558 | 0.105 | 0.424 | 0.248 | 0.221 |
| 206 | 14.1 | 79.0  | 0.078 | 2.000  | 4  | 0.000 | 1.073 | 1.089 | 0.000 | 0.851 | 0.000 | 0.339 |
| 207 | 21.1 | 171.0 | 0.195 | 1.456  | 14 | 0.912 | 0.367 | 0.260 | 0.207 | 0.184 | 0.360 | 0.372 |
| 208 | 10.0 | 38.5  | 1.915 | 2.000  | 8  | 1.060 | 1.032 | 0.936 | 0.000 | 0.686 | 0.000 | 0.282 |
| 209 | 5.7  | 28.0  | 0.447 | 1.000  | 8  | 0.971 | 0.000 | 0.000 | 0.914 | 0.622 | 0.858 | 0.192 |
| 210 | 18.3 | 95.5  | 0.011 | 2.050  | 9  | 1.083 | 0.966 | 0.787 | 0.000 | 0.602 | 0.000 | 0.374 |
| 211 | 2.8  | 8.0   | 1.000 | 1.000  | 4  | 0.000 | 0.000 | 0.000 | 1.345 | 0.845 | 0.926 | 0.032 |
| 212 | 5.7  | 22.5  | 1.591 | 1.143  | 7  | 0.650 | 0.336 | 0.317 | 1.050 | 0.749 | 1.003 | 0.114 |
| 213 | 19.1 | 112.5 | 0.441 | 2.700  | 5  | 0.011 | 1.123 | 1.093 | 0.000 | 0.792 | 0.000 | 0.338 |
| 214 | 4.9  | 18.5  | 1.521 | 1.167  | 6  | 0.145 | 0.379 | 0.408 | 1.194 | 0.790 | 0.965 | 0.148 |
| 215 | 19.7 | 89.0  | 1.082 | 3.143  | 7  | 0.611 | 1.079 | 1.028 | 0.000 | 0.717 | 0.000 | 0.286 |
| 216 | 3.5  | 12.0  | 1.200 | 1.000  | 6  | 0.138 | 0.000 | 0.000 | 1.199 | 0.769 | 0.942 | 0.112 |
| 217 | 30.2 | 181.0 | 0.074 | 2.528  | 8  | 1.021 | 0.990 | 0.892 | 0.000 | 0.619 | 0.000 | 0.454 |
| 218 | 13.1 | 56.5  | 0.366 | 2.217  | 6  | 0.137 | 1.093 | 1.061 | 0.000 | 0.781 | 0.000 | 0.305 |
| 219 | 6.4  | 31.0  | 0.831 | 1.000  | 8  | 1.034 | 0.000 | 0.000 | 0.890 | 0.665 | 0.939 | 0.198 |
| 220 | 18.7 | 98.5  | 0.534 | 2.800  | 5  | 0.011 | 1.110 | 1.108 | 0.000 | 0.770 | 0.000 | 0.279 |
| 221 | 9.2  | 67.0  | 0.142 | 1.000  | 4  | 0.000 | 0.000 | 0.000 | 1.149 | 0.756 | 0.842 | 0.283 |
| 222 | 28.0 | 212.5 | 0.096 | 1.327  | 6  | 0.146 | 0.654 | 0.708 | 0.980 | 0.840 | 1.009 | 0.452 |
| 223 | 17.6 | 86.0  | 0.047 | 2.630  | 4  | 0.000 | 1.094 | 1.144 | 0.000 | 0.859 | 0.000 | 0.267 |
| 224 | 16.9 | 87.5  | 0.311 | 2.542  | 6  | 0.137 | 1.081 | 1.083 | 0.000 | 0.756 | 0.000 | 0.308 |
| 225 | 17.4 | 82.0  | 0.120 | 2.786  | 6  | 0.141 | 1.119 | 1.081 | 0.000 | 0.791 | 0.000 | 0.235 |
| 226 | 8.5  | 49.0  | 0.268 | 1.200  | 5  | 0.011 | 0.403 | 0.450 | 1.086 | 0.744 | 0.878 | 0.215 |
| 227 | 15.7 | 69.0  | 0.013 | 2.685  | 4  | 0.000 | 1.104 | 1.190 | 0.000 | 0.805 | 0.000 | 0.237 |
| 228 | 2.8  | 8.0   | 1.000 | 1.000  | 4  | 0.000 | 0.000 | 0.000 | 1.345 | 0.845 | 0.926 | 0.021 |
| 229 | 19.8 | 104.0 | 0.181 | 3.111  | 4  | 0.000 | 1.033 | 1.190 | 0.000 | 0.782 | 0.000 | 0.339 |
| 230 | 3.5  | 12.0  | 1.200 | 1.000  | 6  | 0.138 | 0.000 | 0.000 | 1.199 | 0.769 | 0.942 | 0.059 |
| 231 | 12.5 | 48.5  | 0.654 | 2.154  | 4  | 0.000 | 1.136 | 1.244 | 0.000 | 0.937 | 0.000 | 0.162 |
| 232 | 12.1 | 22.0  | 0.904 | 4.167  | 4  | 0.000 | 0.000 | 0.000 | 0.000 | 0.980 | 0.000 | 0.153 |
| 233 | 5.7  | 22.5  | 1.591 | 1.143  | 7  | 0.636 | 0.318 | 0.317 | 1.045 | 0.715 | 0.973 | 0.183 |
| 234 | 6.4  | 28.0  | 0.748 | 1.286  | 5  | 0.011 | 0.586 | 0.696 | 1.172 | 0.783 | 0.922 | 0.246 |
| 235 | 16.0 | 70.0  | 0.988 | 2.638  | 7  | 0.692 | 1.114 | 1.056 | 0.000 | 0.803 | 0.000 | 0.183 |
| 236 | 15.6 | 90.5  | 0.502 | 2.444  | 6  | 0.131 | 1.045 | 1.091 | 0.000 | 0.733 | 0.000 | 0.279 |
| 237 | 9.2  | 60.5  | 1.256 | 1.083  | 6  | 0.133 | 0.179 | 0.169 | 1.016 | 0.697 | 0.905 | 0.248 |
| 238 | 18.8 | 127.5 | 0.222 | 2.000  | 6  | 0.135 | 1.035 | 1.044 | 0.000 | 0.771 | 0.000 | 0.334 |
| 239 | 13.8 | 57.5  | 1.072 | 2.185  | 9  | 1.142 | 1.034 | 0.817 | 0.000 | 0.650 | 0.000 | 0.258 |
| 240 | 11.4 | 52.5  | 1.211 | 1.783  | 6  | 0.140 | 1.162 | 1.094 | 0.477 | 0.768 | 0.708 | 0.150 |
| 241 | 17.7 | 86.0  | 0.660 | 2.534  | 8  | 1.136 | 1.080 | 0.925 | 0.000 | 0.745 | 0.000 | 0.391 |
| 242 | 23.0 | 267.5 | 0.079 | 1.489  | 4  | 0.000 | 0.928 | 1.079 | 1.013 | 0.715 | 0.856 | 0.596 |
| 243 | 4.9  | 18.5  | 1.521 | 1.167  | 6  | 0.145 | 0.379 | 0.408 | 1.194 | 0.790 | 0.965 | 0.095 |
| 244 | 18.9 | 91.5  | 1.293 | 2.929  | 7  | 0.653 | 1.167 | 0.989 | 0.000 | 0.793 | 0.000 | 0.233 |
| 245 | 25.9 | 128.0 | 0.097 | 3.156  | 8  | 1.166 | 1.012 | 0.939 | 0.000 | 0.726 | 0.000 | 0.445 |
| 246 | 13.0 | 3.0   | 0.115 | 13.000 | 4  | 0.001 | 0.000 | 0.000 | 0.000 | 1.434 | 0.000 | 0.000 |
